# Supplementary material
Source: PubMed Central journal article supplement (PMC5518568)
Supplement: jciinsight-2-94249-s001.pdf [file jciinsight-2-94249-s001.pdf]

## SUPPLEMENTAL MATERIAL

## DISCUSSION

Transcriptome changes were confirmed by RT-PCR. A thorough description of these genes and their role in myocyte disease/function are presented below.

WNT- An increase in WNT9A expression was observed in pediatric and adult DCM patients (Figures 4A and 4D). WNT stimulates  $\beta$ -catenin signaling through frizzled receptors, and frizzled receptors were also significantly increased (FZD1  $p=0.0235$ , FZD4  $p=0.0347$ ), which could lead to an increase in  $\beta$ -catenin signaling, and effects in cell regeneration and/or pathologic remodeling(1). WNT9A has also been implicated in the epicardial-to-mesenchymal transition in a neonatal mouse model of cardiac injury, suggesting a role for WNT9A in fibrosis formation in the neonatal heart(2). Interestingly, we have recently shown that the presence of fibrosis is greatly diminished in the pediatric DCM heart(3).

MDK - MDK is highly expressed during embryonic development, and is involved in growth, development and repair. In the heart, MDK has been shown to have a protective effect against tachycardia-induced HF and acute ischemia/reperfusion injury (reviewed in(4)); transgenic over-expression or increased circulating MDK levels have a protective effect in animal models of ischemic HF, through its anti-apoptotic and pro-angiogenic effects(4). However, in a pressure overload model of HF (transverse aortic constriction – TAC), increased MDK levels resulted in worsening of HF and pathologic remodeling(4). MDK stimulates the JAK/STAT pathway, resulting in tumor cell proliferation and cell survival(5). In addition, MDK is expressed in mouse embryonic stem cells promoting cell proliferation and renewal through the PI3K/Akt pathway(6). MDK expression is dramatically increased in pediatric but not in adult DCM patients (Figures 4A and 4D), suggesting a pediatric-specific function for MDK.

CTF1 and the JAK/STAT pathway – JAK2 expression is up-regulated in pediatric and adult DCM patients (Figures 4A and D), suggesting an increase in activity of the JAK/STAT pathway. The JAK/STAT pathway is involved in reprogramming of fibroblasts into proliferative

induced cardiac progenitor cells and in cell survival and pathologic remodeling (reviewed in(7)). JAK2 activation alone is sufficient to induce self-renewal of stem cells, and is a major component of pluripotent stem cell signaling(7). In addition, CTF1, a pro-proliferative stem cell cytokine that can induce hypertrophy and prolong survival, is up-regulated in pediatric DCM patients. CTF1 binds to the Leukemia Inhibitory Factor (LIF) receptor and stimulates signaling via JAK/STAT(8). Although our results did not show a significant increase in CTF1 expression in adult patients, another study showed a small, but significant increase in CTF1 expression in adult DCM and ischemic HF patients(9).

FGF1 and FGF18 - Increases in FGF1 ( $p=0.00026$ ) and FGF18 ( $p=0.00039$ ) in the pediatric DCM heart suggest activation of FGF signaling. FGF1 can induce cardiomyocyte proliferation and differentiation(10). FGF18 can inhibit fibroblast proliferation and decrease apoptosis(11) and is widely expressed in cardiovascular tissue, including the left and right ventricles. Its expression is substantially decreased in healthy adult hearts(12). Notably, FGF18 is known to maintain stem cell populations(13).

DDX17 – DDX17 is an RNA helicase that, in association with DDX5, is involved in orchestrating transcription and splicing to coordinate cellular differentiation(14). Down-regulation of DDX5 and DDX17 results in myoblast differentiation(14). In addition, DDX17 binds to SOX2, resulting in increased tumorigenesis and stem-like features conferred by SOX2 in cancer cells(15). The up-regulation of DDX17 is in agreement with dedifferentiation and cellular proliferation in pediatric DCM hearts.

HMGB2 - HMGB2 is a non-histone chromatin-associated protein that is highly up-regulated in mesenchymal stem cells(16). HMGB2 interacts with Oct4 in mouse or human embryonic stem cells(17) and its expression declines during differentiation of mesenchymal stem cells(16). Furthermore, HMGB2 expression is associated with telomerase activity; in human neuroectodermal cells derived from human embryonic stem cells, down-regulation of HMGB2

resulted in a dramatic increase in telomerase activity(18). Interestingly, the cardiac stem cells identified by Wehman et al in pediatric DCM patients had shorter telomeres and decreased proliferative properties(19). The increase in HMGB2 expression observed in pediatric patients may affect telomere length.

**TBX5** – The T-box protein 5 is increased in pediatric DCM hearts. TBX5 functions in early heart development and activates the myocardial gene program(20). During reprogramming of fibroblasts into cardiac progenitor cells, TBX5, in addition to GATA4 and MESP1, is important to maintain multipotency and proliferation(7). Furthermore, TBX5 is involved in cardiomyogenic reprogramming of adult cardiac stem cells and bone marrow mesenchymal stromal cells(21).

**CXCL12** – CXCL12/SDF-1 is a chemokine integral to cardiac development and repair processes due to its ability to attract stem cells to injured myocardium(22). Moreover, delivery of mesenchymal stem cells over-expressing CXCL12 to the injured myocardium significantly increases the homing of bone marrow-derived progenitor cells to the myocardium, resulting in regeneration of new cardiomyocytes and blood vessels in a myocardial infarction model(23).

**CUX1** – is part of a family of transcriptional factors that can activate or repress transcription, and its expression is increased in pediatric DCM hearts. CUX1 can regulate expression of several genes involved in DNA replication, progression to S phase and cell motility(24, 25). The long p200 isoform functions as a transcription repressor, which can be proteolytically processed to CUXp110 or CUXp75 isoforms. p110 can act as an activator or repressor, and expression of p75 has not been detected in cardiomyocytes. Proteolytic cleavage of p200 into p110 occurs in response to leptin activation of JAK/STAT and is pro-hypertrophic(26).

**CCND1 and CCND2** - cyclins are a family of proteins involved in regulating cell cycle progression (reviewed in(27)). During cardiac development cyclins are highly expressed and are associated with the increase in myocyte number. Expression is down-regulated post-

naturally as myocytes become differentiated. During cardiac hypertrophy expression of cyclins is increased, which is associated with an increase in cell size. However, this increase is transient lasting hours or days depending on insult and/or species, consistent with no changes in CCND1 expression in adult HF (Figure 4D). Interestingly, CCND1 and CCND2 expression is increased in pediatric DCM. This may be due to re-expression of these genes, or that their expression was maintained post-natally, negatively affecting cardiomyocyte maturation. Moreover, mouse over-expression of CCND2 results in increased cardiomyocyte proliferation post-natally(28). Although speculative, this increase could be associated with increased myocyte division that may result in improper differentiation.

Based on published data and putative transcription factor binding sites shown in Figure 5C, there is a possible interaction between paediatric DCM dysregulated factors. CUX1 is predicted to regulate expression of TBX5, HMGB2, CTF1, CXCL12, JAK2, DDX17 and WNT9A. In addition, previous studies have shown that WNT/ $\beta$ -catenin pathway can regulate expression of FGF18(29) and MDK(30). MDK, in turn can activate the JAK/STAT pathway(5), which has been shown to promote expression of p110CUX1(26). The JAK/STAT pathway can also activate WNT/ $\beta$ -catenin. Furthermore, CTF1 can activate the JAK/STAT pathway(31). Finally, DDX17 and DDX5 promote expression of CCND1 through  $\beta$ -catenin(15, 32). This suggests a possible combinatorial response that results in an age-dependent activation of genes linked to pluripotency, proliferation, and remodelling.

## REFERENCES

1. Ozhan, G., and Weidinger, G. 2015. Wnt/beta-catenin signaling in heart regeneration. *Cell Regen (Lond)* 4:3.
2. Mizutani, M., Wu, J.C., and Nusse, R. 2016. Fibrosis of the Neonatal Mouse Heart After Cryoinjury Is Accompanied by Wnt Signaling Activation and Epicardial-to-Mesenchymal Transition. *J Am Heart Assoc* 5:e002457.
3. Woulfe, K.C., Siomos, A.K., Nguyen, H., SooHoo, M., Galambo, C., Stauffer, B.L., Sucharov, C., and Miyamoto, S. 2016. Fibrosis and Fibrotic Gene Expression in Pediatric and Adult Patients with Idiopathic Dilated Cardiomyopathy. *J Card Fail.*
4. Badila, E., Daraban, A.M., Tintea, E., Bartos, D., Alexandru, N., and Georgescu, A. 2015. Midkine proteins in cardio-vascular disease. Where do we come from and where are we heading to? *European journal of pharmacology* 762:464-471.
5. Ratovitski, E.A., Kotzbauer, P.T., Milbrandt, J., Lowenstein, C.J., and Burrow, C.R. 1998. Midkine induces tumor cell proliferation and binds to a high affinity signaling receptor associated with JAK tyrosine kinases. *J Biol Chem* 273:3654-3660.
6. Yao, X., Tan, Z., Gu, B., Wu, R.R., Liu, Y.K., Dai, L.C., and Zhang, M. 2010. Promotion of self-renewal of embryonic stem cells by midkine. *Acta Pharmacol Sin* 31:629-637.
7. Lalit, P.A., Salick, M.R., Nelson, D.O., Squirrell, J.M., Shafer, C.M., Patel, N.G., Saeed, I., Schmuck, E.G., Markandeya, Y.S., Wong, R., et al. 2016. Lineage Reprogramming of Fibroblasts into Proliferative Induced Cardiac Progenitor Cells by Defined Factors. *Cell stem cell* 18:354-367.
8. Miyake, T., Alli, N.S., Aziz, A., Knudson, J., Fernando, P., Megeney, L.A., and McDermott, J.C. 2009. Cardiotrophin-1 maintains the undifferentiated state in skeletal myoblasts. *J Biol Chem* 284:19679-19693.
9. Zolk, O., Ng, L.L., O'Brien, R.J., Weyand, M., and Eschenhagen, T. 2002. Augmented expression of cardiotrophin-1 in failing human hearts is accompanied by diminished glycoprotein 130 receptor protein abundance. *Circulation* 106:1442-1446.
10. Lin, H.Y., Lee, D.C., Wang, H.D., Chi, Y.H., and Chiu, I.M. 2015. Activation of FGF1B Promoter and FGF1 Are Involved in Cardiogenesis Through the Signaling of PKC, but Not MAPK. *Stem Cells Dev* 24:2853-2863.
11. Joannes, A., Brayer, S., Besnard, V., Marchal-Somme, J., Jaillet, M., Mordant, P., Mal, H., Borie, R., Crestani, B., and Mailleux, A.A. 2016. FGF9 and FGF18 in idiopathic pulmonary fibrosis promote survival and migration and inhibit myofibroblast differentiation of human lung fibroblasts in vitro. *Am J Physiol Lung Cell Mol Physiol* 310:L615-629.
12. Antoine, M., Wirz, W., Tag, C.G., Gressner, A.M., Wycislo, M., Muller, R., and Kiefer, P. 2006. Fibroblast growth factor 16 and 18 are expressed in human cardiovascular tissues and induce on endothelial cells migration but not proliferation. *Biochem Biophys Res Commun* 346:224-233.
13. Leishman, E., Howard, J.M., Garcia, G.E., Miao, Q., Ku, A.T., Dekker, J.D., Tucker, H., and Nguyen, H. 2013. Foxp1 maintains hair follicle stem cell quiescence through regulation of Fgf18. *Development* 140:3809-3818.
14. Dardenne, E., Polay Espinoza, M., Fattet, L., Germann, S., Lambert, M.P., Neil, H., Zonta, E., Mortada, H., Gratadou, L., Deygas, M., et al. 2014. RNA helicases DDX5 and DDX17 dynamically orchestrate transcription, miRNA, and splicing programs in cell differentiation. *Cell Rep* 7:1900-1913.
15. Alqahtani, H., Gopal, K., Gupta, N., Jung, K., Alshareef, A., Ye, X., Wu, F., Li, L., and Lai, R. 2016. DDX17 (P72), a Sox2 binding partner, promotes stem-like features conferred by Sox2 in a small cell population in estrogen receptor-positive breast cancer. *Cell Signal* 28:42-50.
16. Taniguchi, N., Carames, B., Hsu, E., Cherqui, S., Kawakami, Y., and Lotz, M. 2011. Expression patterns and function of chromatin protein HMGB2 during mesenchymal stem cell differentiation. *J Biol Chem* 286:41489-41498.

17. Campbell, P.A., and Rudnicki, M.A. 2013. Oct4 interaction with Hmgb2 regulates Akt signaling and pluripotency. *Stem cells* 31:1107-1120.
18. Bagherpoor, A.J., Dolezalova, D., Barta, T., Kucirek, M., Sani, S.A., Esner, M., Bosakova, M.K., Vinarsky, V., Peskova, L., Hampl, A., et al. 2016. Properties of Human Embryonic Stem Cells and their Differentiated Derivatives Depend on Non-histone DNA-Binding HMGB1 and HMGB2 Proteins. *Stem Cells Dev.*
19. Wehman, B., Sharma, S., Mishra, R., Guo, Y., Colletti, E.J., Kon, Z.N., Datla, S.R., Siddiqui, O.T., Balachandran, K., and Kaushal, S. 2015. Pediatric End-Stage Failing Hearts Demonstrate Increased Cardiac Stem Cells. *The Annals of thoracic surgery* 100:615-622.
20. Greulich, F., Rudat, C., and Kispert, A. 2011. Mechanisms of T-box gene function in the developing heart. *Cardiovasc Res* 91:212-222.
21. Belian, E., Nosedá, M., Abreu Paiva, M.S., Leja, T., Sampson, R., and Schneider, M.D. 2015. Forward Programming of Cardiac Stem Cells by Homogeneous Transduction with MYOCD plus TBX5. *PLoS One* 10:e0125384.
22. Elmadbouh, I., Haider, H., Jiang, S., Idris, N.M., Lu, G., and Ashraf, M. 2007. Ex vivo delivered stromal cell-derived factor-1alpha promotes stem cell homing and induces angiomyogenesis in the infarcted myocardium. *J Mol Cell Cardiol* 42:792-803.
23. Zhao, T., Zhang, D., Millard, R.W., Ashraf, M., and Wang, Y. 2009. Stem cell homing and angiomyogenesis in transplanted hearts are enhanced by combined intramyocardial SDF-1alpha delivery and endogenous cytokine signaling. *Am J Physiol Heart Circ Physiol* 296:H976-986.
24. Hulea, L., and Nepveu, A. 2012. CUX1 transcription factors: from biochemical activities and cell-based assays to mouse models and human diseases. *Gene* 497:18-26.
25. Truscott, M., Harada, R., Vadnais, C., Robert, F., and Nepveu, A. 2008. p110 CUX1 cooperates with E2F transcription factors in the transcriptional activation of cell cycle-regulated genes. *Mol Cell Biol* 28:3127-3138.
26. Gan, X.T., Zhao, G., Huang, C.X., Rowe, A.C., Purdham, D.M., and Karmazyn, M. 2013. Identification of fat mass and obesity associated (FTO) protein expression in cardiomyocytes: regulation by leptin and its contribution to leptin-induced hypertrophy. *PLoS One* 8:e74235.
27. Hotchkiss, A., Robinson, J., MacLean, J., Feridooni, T., Wafa, K., and Pasumarthi, K.B. 2012. Role of D-type cyclins in heart development and disease. *Can J Physiol Pharmacol* 90:1197-1207.
28. Yamak, A., Temsah, R., Maharsy, W., Caron, S., Paradis, P., Aries, A., and Nemer, M. 2012. Cyclin D2 rescues size and function of GATA4 haplo-insufficient hearts. *Am J Physiol Heart Circ Physiol* 303:H1057-1066.
29. Koneczny, I., Schulenburg, A., Hudec, X., Knofler, M., Holzmann, K., Piazza, G., Reynolds, R., Valent, P., and Marian, B. 2015. Autocrine fibroblast growth factor 18 signaling mediates Wnt-dependent stimulation of CD44-positive human colorectal adenoma cells. *Mol Carcinog* 54:789-799.
30. Tang, S.L., Gao, Y.L., and Chen, X.B. 2015. Wnt/beta-catenin up-regulates Midkine expression in glioma cells. *Int J Clin Exp Med* 8:12644-12649.
31. Sharma, M., Zhou, J., Gauchat, J.F., Sharma, R., McCarthy, E.T., Srivastava, T., and Savin, V.J. 2015. Janus kinase 2/signal transducer and activator of transcription 3 inhibitors attenuate the effect of cardiotrophin-like cytokine factor 1 and human focal segmental glomerulosclerosis serum on glomerular filtration barrier. *Transl Res* 166:384-398.
32. Shin, S., Rossow, K.L., Grande, J.P., and Janknecht, R. 2007. Involvement of RNA helicases p68 and p72 in colon cancer. *Cancer Res* 67:7572-7578.

| ID                                     | Group      | Sex          | Age at tissue collection | EF/FS (%)    | LVIDd (cm) | z-score          | Genetic Testing | Etiology | Inotrope*   | Digoxin    | ACEi       | Beta Blocker | Diuretic   | Anti-Arrhythmic | VAD        | RNA Seq   | Cell # & Area | RT-PCR    |
|----------------------------------------|------------|--------------|--------------------------|--------------|------------|------------------|-----------------|----------|-------------|------------|------------|--------------|------------|-----------------|------------|-----------|---------------|-----------|
| <b>Non-Failing (n = 24)</b>            |            |              |                          |              |            |                  |                 |          |             |            |            |              |            |                 |            |           |               |           |
| 1                                      | NF         | F            | 1.3                      | 49/20        | NA         | NA               |                 |          | Y           | N          | N          | N            | N          | N               | N          | x         |               | x         |
| 2                                      | NF         | M            | 1.4                      | NA           | NA         | NA               |                 |          | N           | N          | N          | N            | N          | N               | N          | x         |               | x         |
| 3                                      | NF         | F            | 1.5                      | 27/--        | NA         | NA               |                 |          | Y           | N          | N          | N            | N          | N               | N          | x         |               |           |
| 4                                      | NF         | F            | 8.64                     | NA           | NA         | NA               |                 |          | Y           | N          | N          | N            | N          | N               | N          | x         |               | x         |
| 5                                      | NF         | M            | 8.69                     | NA           | NA         | NA               |                 |          | NA          | N          | N          | N            | N          | N               | N          | x         |               | x         |
| 6                                      | NF         | F            | 11.7                     | NA           | NA         | NA               |                 |          | Y           | N          | N          | N            | N          | N               | N          | x         |               | x         |
| 7                                      | NF         | M            | 7.4                      | NA           | NA         | NA               |                 |          | Y           | N          | N          | N            | N          | N               | N          | x         | x             |           |
| 8                                      | NF         | M            | 13.65                    | NA           | NA         | NA               |                 |          | Y           | N          | N          | N            | N          | N               | N          |           | x             | x         |
| 9                                      | NF         | M            | 14                       | 37/--        | NA         | NA               |                 |          | NA          | N          | N          | N            | N          | N               | N          |           | x             | x         |
| 10                                     | NF         | F            | 16                       | 76/--        | NA         | NA               |                 |          | NA          | N          | N          | N            | N          | N               | N          |           | x             | x         |
| 11                                     | NF         | M            | 17                       | NA           | NA         | NA               |                 |          | NA          | N          | N          | N            | N          | N               | N          |           | x             | x         |
| 12                                     | NF         | M            | 2.87                     | NA           | NA         | NA               |                 |          | Y           | N          | N          | N            | N          | N               | N          |           | x             |           |
| 13                                     | NF         | F            | 8                        | NA           | NA         | NA               |                 |          | N           | N          | N          | N            | N          | N               | N          |           | x             | x         |
| 14                                     | NF         | F            | 14                       | 50/24        | NA         | NA               |                 |          | NA          | N          | N          | N            | N          | N               | N          |           |               | x         |
| 15                                     | NF         | M            | 15                       | 54/--        | NA         | NA               |                 |          | NA          | N          | N          | N            | N          | N               | N          |           |               | x         |
| 16                                     | NF         | M            | 15                       | NA           | NA         | NA               |                 |          | NA          | N          | N          | N            | N          | N               | N          |           |               | x         |
| 17                                     | NF         | F            | 16                       | 30/--        | NA         | NA               |                 |          | NA          | N          | N          | N            | N          | N               | N          |           |               | x         |
| 18                                     | NF         | M            | 17                       | 65/--        | NA         | NA               |                 |          | NA          | N          | N          | N            | N          | N               | N          |           |               | x         |
| 19                                     | NF         | F            | 17                       | 60/--        | NA         | NA               |                 |          | NA          | N          | N          | N            | N          | N               | N          |           |               | x         |
| 20                                     | NF         | F            | 17                       | 20/--        | NA         | NA               |                 |          | NA          | N          | N          | N            | N          | N               | N          |           |               | x         |
| 21                                     | NF         | M            | 17                       | 35/28        | NA         | NA               |                 |          | NA          | N          | N          | N            | N          | N               | N          |           |               | x         |
| 22                                     | NF         | M            | 17                       | 50/24        | NA         | NA               |                 |          | N           | N          | N          | N            | N          | N               | N          |           |               | x         |
| 23                                     | NF         | M            | 7                        | NA           | NA         | NA               |                 |          | N           | N          | N          | N            | N          | N               | N          |           |               | x         |
| 24                                     | NF         | M            | 9.51                     | NA           | NA         | NA               |                 |          | Y           | N          | N          | N            | N          | N               | N          |           |               | x         |
| <b>Dilated Cardiomyopathy (n = 37)</b> |            |              |                          |              |            |                  |                 |          |             |            |            |              |            |                 |            |           |               |           |
| 25                                     | DCM        | M            | 0.05                     | N/A          | N/A        | N/A              | N               | LV NC    | N           | Y          | N          | N            | Y          | N               | N          | x         |               | x         |
| 26                                     | DCM        | M            | 12.46                    | --/7         | 6          | 5.7 <sup>#</sup> | N               | IDC      | Y           | Y          | Y          | N            | Y          | N               | N          | x         |               | x         |
| 27                                     | DCM        | F            | 10.89                    | --/22        | 6.3        | 8.7              | N               | IDC      | Y           | Y          | Y          | Y            | Y          | Y               | N          | x         |               | x         |
| 28                                     | DCM        | M            | 4.62                     | 29/16        | 3.7        | 1.4              | N               | IDC      | N           | Y          | Y          | N            | N          | N               | N          | x         |               | x         |
| 29                                     | DCM        | M            | 2.87                     | 14/7         | 4.5        | 5.3              | N               | IDC      | Y           | N          | Y          | N            | Y          | Y               | N          | x         |               | x         |
| 30                                     | DCM        | F            | 11.59                    | --/16        | 5.7        | 5                | N               | LV NC    | N           | N          | Y          | N            | N          | Y               | N          | x         |               | x         |
| 31                                     | DCM        | F            | 3.59                     | 28/15        | 5.7        | 10               | N               | IDC      | Y           | N          | Y          | N            | Y          | N               | N          | x         | x             | x         |
| 32                                     | DCM        | F            | 4.08                     | 37/12        | 5.4        | 6.3              | Y*              | IDC      | Y           | N          | Y          | N            | N          | N               | N          |           | x             | x         |
| 33                                     | DCM        | F            | 11.45                    | 27/16        | 6.5        | 5.4              | N               | IDC      | Y           | N          | N          | N            | Y          | N               | Y          |           | x             | x         |
| 34                                     | DCM        | M            | 13.58                    | 20/11        | 7.3        | 10               | N               | IDC      | Y           | N          | Y          | N            | Y          | N               | N          |           | x             | x         |
| 35                                     | DCM        | M            | 0.96                     | --/5         | 5          | 9.4 <sup>#</sup> | N               | IDC      | Y           | Y          | Y          | N            | Y          | N               | N          |           |               | x         |
| 36                                     | DCM        | F            | 0.97                     | --/8         | 3.9        | 5.3              | Y*              | IDC      | Y           | N          | N          | N            | Y          | N               | N          |           |               | x         |
| 37                                     | DCM        | F            | 15.77                    | --/26        | 7.2        | 8.4              | N               | IDC      | Y           | N          | Y          | Y            | Y          | N               | N          |           |               | x         |
| 38                                     | DCM        | F            | 0.05                     | --/4         | 3.7        | 10.7             | N               | IDC      | Y           | N          | N          | N            | N          | N               | N          |           |               | x         |
| 39                                     | DCM        | F            | 0.78                     | --/10        | 4.3        | 10.4             | N               | IDC      | Y           | Y          | Y          | N            | Y          | N               | N          |           |               | x         |
| 40                                     | DCM        | M            | 1.3                      | --/5         | 5.8        | 13 <sup>#</sup>  | N               | IDC      | Y           | N          | Y          | N            | Y          | Y               | N          |           |               | x         |
| 41                                     | DCM        | F            | 1.39                     | 22/17        | 4.2        | 10.2             | N               | IDC      | Y           | Y          | Y          | N            | Y          | N               | N          |           |               | x         |
| 42                                     | DCM        | M            | 4.53                     | 15/7         | 5          | 4.8              | N               | IDC      | Y           | Y          | Y          | N            | Y          | N               | N          |           |               | x         |
| 43                                     | DCM        | M            | 17.67                    | --/11        | 7.1        | 8.7              | N               | IDC      | Y           | Y          | Y          | N            | Y          | N               | N          |           |               | x         |
| 44                                     | DCM        | F            | 2.47                     | 41/18        | 4.3        | 4.3              | N               | IDC      | Y           | Y          | Y          | N            | Y          | N               | N          |           |               | x         |
| 45                                     | DCM        | F            | 0.34                     | 25/8         | 2.6        | 5.1              | N               | IDC      | Y           | N          | Y          | N            | N          | N               | N          |           |               | x         |
| 46                                     | DCM        | F            | 12.08                    | 25/8         | 6.7        | 7.9              | N               | IDC      | Y           | N          | Y          | N            | Y          | N               | N          |           |               | x         |
| 47                                     | DCM        | M            | 16.13                    | 17/9         | 8.5        | 7.7              | N               | IDC      | Y           | N          | Y          | Y            | N          | Y               | N          |           |               | x         |
| 48                                     | DCM        | F            | 3.87                     | 27/20        | 4.5        | 4.9              | N               | IDC      | Y           | Y          | Y          | Y            | Y          | N               | N          |           |               | x         |
| 49                                     | DCM        | M            | 9.76                     | 21/17        | 5.9        | 6.7              | Y*              | IDC      | Y           | N          | Y          | N            | Y          | Y               | N          |           |               | x         |
| 50                                     | DCM        | F            | 14.93                    | --/4         | 6.8        | 7.8              | N               | IDC      | Y           | N          | Y          | Y            | Y          | N               | Y          |           |               | x         |
| 51                                     | DCM        | M            | 0.58                     | --/8         | 4.6        | 10.4             | N               | IDC      | Y           | N          | N          | N            | Y          | N               | Y          |           |               | x         |
| 52                                     | DCM        | M            | 1                        | 17/5         | 5.7        | 14.2             | N               | IDC      | Y           | N          | Y          | N            | Y          | N               | N          |           |               | x         |
| 53                                     | DCM        | F            | 0.06                     | --/5         | 2.5        | 2.5              | N               | IDC      | Y           | N          | N          | N            | Y          | Y               | N          |           |               | x         |
| 54                                     | DCM        | F            | 0.55                     | --/4         | 4.4        | 10.4             | N               | VM       | Y           | N          | Y          | N            | Y          | N               | N          |           |               | x         |
| 55                                     | DCM        | F            | 9                        | NA           | NA         | NA               | NA              | NA       | Y           | N          | N          | N            | N          | N               | N          |           |               | x         |
| 56                                     | DCM        | M            | 16                       | NA           | NA         | NA               | NA              | NA       | Y           | N          | N          | N            | N          | N               | N          |           |               | x         |
| 57                                     | DCM        | F            | 3.8                      | --/12        | 5          | 5.6              | N               | IDC      | N           | Y          | Y          | N            | Y          | N               | N          |           |               | x         |
| 58                                     | DCM        | M            | 13.17                    | --/23        | 7.7        | 11.1             | N               | IDC      | Y           | Y          | Y          | Y            | Y          | N               | N          |           |               | x         |
| 59                                     | DCM        | M            | 2.3                      | --/10        | 3.4        | 3.1              | N               | IDC      | Y           | N          | Y          | N            | Y          | N               | N          |           |               | x         |
| 60                                     | DCM        | F            | 0.92                     | --/8         | 4.1        | 9.8              | N               | IDC      | Y           | N          | Y          | N            | N          | N               | N          |           |               | x         |
| 61                                     | DCM        | M            | 13.94                    | --/12        | 5.8        | 3.9 <sup>#</sup> | N               | IDC      | Y           | Y          | N          | N            | Y          | N               | N          |           |               | x         |
| <b>RNA Seq</b>                         | <b>NF</b>  | <b>43% M</b> | <b>5.8</b>               | <b>38/20</b> |            |                  |                 |          | <b>83%</b>  | <b>0%</b>  | <b>0%</b>  | <b>0%</b>    | <b>0%</b>  | <b>0%</b>       | <b>0%</b>  | <b>0%</b> | <b>0%</b>     | <b>0%</b> |
|                                        | <b>DCM</b> | <b>57% M</b> | <b>6.6</b>               | <b>24/14</b> | <b>5.2</b> | <b>7.4</b>       |                 |          | <b>57%</b>  | <b>57%</b> | <b>86%</b> | <b>14%</b>   | <b>71%</b> | <b>42%</b>      | <b>0%</b>  | <b>0%</b> | <b>0%</b>     | <b>0%</b> |
| <b>Histology</b>                       | <b>NF</b>  | <b>71% M</b> | <b>11.3</b>              | <b>57/--</b> |            |                  |                 |          | <b>75%</b>  | <b>0%</b>  | <b>0%</b>  | <b>0%</b>    | <b>0%</b>  | <b>0%</b>       | <b>0%</b>  | <b>0%</b> | <b>0%</b>     | <b>0%</b> |
|                                        | <b>DCM</b> | <b>57% M</b> | <b>8.2</b>               | <b>28/14</b> | <b>6.2</b> | <b>7.9</b>       |                 |          | <b>100%</b> | <b>0%</b>  | <b>75%</b> | <b>0%</b>    | <b>75%</b> | <b>0%</b>       | <b>25%</b> | <b>0%</b> | <b>0%</b>     | <b>0%</b> |
| <b>RT-PCR</b>                          | <b>NF</b>  | <b>57% M</b> | <b>12.5</b>              | <b>48/24</b> |            |                  |                 |          | <b>56%</b>  | <b>0%</b>  | <b>0%</b>  | <b>0%</b>    | <b>0%</b>  | <b>0%</b>       | <b>0%</b>  | <b>0%</b> | <b>0%</b>     | <b>0%</b> |
|                                        | <b>DCM</b> | <b>57% M</b> | <b>6.5</b>               | <b>24/11</b> | <b>5.3</b> | <b>7.4</b>       |                 |          | <b>90%</b>  | <b>38%</b> | <b>76%</b> | <b>16%</b>   | <b>76%</b> | <b>19%</b>      | <b>11%</b> | <b>0%</b> | <b>0%</b>     | <b>0%</b> |
| <b>All Pts</b>                         | <b>NF</b>  | <b>60% M</b> | <b>11.4</b>              | <b>62/28</b> |            |                  |                 |          | <b>67%</b>  | <b>0%</b>  | <b>0%</b>  | <b>0%</b>    | <b>0%</b>  | <b>0%</b>       | <b>0%</b>  | <b>0%</b> | <b>0%</b>     | <b>0%</b> |
|                                        | <b>DCM</b> | <b>57% M</b> | <b>6.5</b>               | <b>24/11</b> | <b>5.3</b> | <b>7.6</b>       |                 |          | <b>90%</b>  | <b>38%</b> | <b>76%</b> | <b>16%</b>   | <b>76%</b> | <b>19%</b>      | <b>11%</b> | <b>0%</b> | <b>0%</b>     | <b>0%</b> |

Table S1: Pediatric Patient Characteristics. Demographic data is divided by method. Average age of patients for RNA Seq: NF = 5.8 yrs; DCM = 6.6 yrs. Average age of patients for histology: NF = 11.3 yrs; DCM = 8.2 yrs. Average age of patients for RT-PCR: 12.5 yrs; DCM



=6.5 yrs. Average age of all patients studied: NF = 11.4 yrs; DCM = 6.5 yrs. ID = Identification, NF = Non-Failing, DCM = Dilated Cardiomyopathy, M = Male, F = Female, ACEi = Angiotensin-Converting Enzyme Inhibitor, EF = Ejection Fraction, FS = Fractional Shortening, NA = Not Available, \*Inotropes include: Phosphodiesterase Inhibitors, Dobutamine, Dopamine, Epinephrine, Norepinephrine, Vasopressin, IDC = idiopathic dilated cardiomyopathy, LV NC = LV non compaction, VM = viral myocarditis, LVIDd = left ventricular internal dimension at end-diastole, calculated via m-mode on echocardiogram, z-score# = Body surface area not available, so the CDC growth curve was used to estimate 50%-ile weight and height based on age and sex to calculate LVIDd z-score; Y\* = Indicates genetic testing was performed and there was no identifiable sarcomeric or disease causing mutation.

| ID                                     | Group | Sex   | Age at tissue collection | EF/FS    | Inotrope* | Digoxin | ACEi | Beta Blocker | Diuretic | Anti-Arrhythmic | VAD | Cell # & Area | RT-PCR |
|----------------------------------------|-------|-------|--------------------------|----------|-----------|---------|------|--------------|----------|-----------------|-----|---------------|--------|
| <b>Non-Failing (n = 19)</b>            |       |       |                          |          |           |         |      |              |          |                 |     |               |        |
| 1                                      | NF    | M     | 22                       | 30 / --  | Y         | NA      | NA   | NA           | Y        | NA              | N   | x             |        |
| 2                                      | NF    | M     | 30                       | 50 / --  | Y         | NA      | NA   | NA           | NA       | NA              | N   | x             |        |
| 3                                      | NF    | M     | 33                       | 70 / --  | Y         | N       | N    | N            | N        | N               | N   | x             |        |
| 4                                      | NF    | M     | 37                       | 65 / --  | Y         | NA      | NA   | NA           | Y        | NA              | N   | x             |        |
| 5                                      | NF    | F     | 51                       | 60 / --  | Y         | NA      | NA   | NA           | NA       | NA              | N   | x             |        |
| 6                                      | NF    | F     | 59                       | NA       | N         | N       | N    | N            | N        | N               | N   | x             |        |
| 7                                      | NF    | F     | 64                       | 88 / --  | Y         | N       | N    | N            | N        | N               | N   | x             |        |
| 8                                      | NF    | F     | 65                       | NA       | Y         | N       | N    | N            | N        | N               | N   | x             |        |
| 9                                      | NF    | F     | 74                       | NA       | N         | N       | N    | N            | N        | N               | N   | x             |        |
| 10                                     | NF    | M     | 29                       | 32 / --  | N         | N       | N    | N            | N        | N               | N   |               | x      |
| 11                                     | NF    | M     | 44                       | 74 / --  | Y         | N       | N    | N            | N        | N               | N   |               | x      |
| 12                                     | NF    | M     | 46                       | 70 / --  | Y         | N       | N    | N            | N        | N               | N   |               | x      |
| 13                                     | NF    | M     | 52                       | 50 / --  | Y         | N       | N    | N            | N        | N               | N   |               | x      |
| 14                                     | NF    | M     | 52                       | 39 / --  | N         | N       | N    | N            | N        | N               | N   |               | x      |
| 15                                     | NF    | M     | 59                       | 60 / --  | Y         | N       | N    | N            | N        | N               | N   |               | x      |
| 16                                     | NF    | F     | 59                       | 35 / --  | N         | N       | N    | Y            | N        | N               | N   |               | x      |
| 17                                     | NF    | M     | 60                       | NA       | N         | N       | N    | N            | N        | N               | N   |               | x      |
| 18                                     | NF    | M     | 65                       | 74 / --  | N         | N       | N    | N            | N        | N               | N   |               | x      |
| 19                                     | NF    | F     | 69                       | NA       | N         | N       | N    | N            | N        | N               | N   |               | x      |
| <b>Dilated Cardiomyopathy (n = 24)</b> |       |       |                          |          |           |         |      |              |          |                 |     |               |        |
| 20                                     | DCM   | M     | 26                       | 15 / --  | Y         | N       | N    | N            | Y        | N               | N   | x             |        |
| 21                                     | DCM   | M     | 35                       | 10 / --  | N         | Y       | Y    | N            | Y        | N               | N   | x             |        |
| 22                                     | DCM   | M     | 49                       | 17 / --  | Y         | Y       | Y    | N            | Y        | Y               | N   | x             |        |
| 23                                     | DCM   | F     | 51                       | 24 / --  | N         | Y       | Y    | N            | Y        | N               | N   | x             |        |
| 24                                     | DCM   | M     | 16                       | NA       | Y         | Y       | Y    | NA           | Y        | NA              | N   |               | x      |
| 25                                     | DCM   | M     | 17                       | 19 / --  | Y         | Y       | Y    | NA           | Y        | NA              | N   |               | x      |
| 26                                     | DCM   | M     | 21                       | -- / 8.5 | N         | N       | Y    | Y            | Y        | N               | N   |               | x      |
| 27                                     | DCM   | M     | 22                       | 11 / --  | Y         | Y       | Y    | Y            | Y        | NA              | N   |               | x      |
| 28                                     | DCM   | M     | 28                       | 10 / --  | Y         | N       | N    | N            | Y        | Y               | N   |               | x      |
| 29                                     | DCM   | M     | 38                       | NA       | Y         | NA      | NA   | NA           | NA       | NA              | N   |               | x      |
| 30                                     | DCM   | M     | 41                       | 17 / --  | N         | Y       | N    | Y            | Y        | N               | N   |               | x      |
| 31                                     | DCM   | F     | 46                       | 20 / --  | N         | Y       | Y    | N            | Y        | N               | N   |               | x      |
| 32                                     | DCM   | M     | 47                       | 8 / --   | N         | Y       | N    | Y            | Y        | N               | N   |               | x      |
| 33                                     | DCM   | M     | 48                       | 10 / --  | N         | N       | N    | N            | N        | Y               | N   |               | x      |
| 34                                     | DCM   | M     | 52                       | NA       | Y         | Y       | NA   | NA           | NA       | NA              | N   |               | x      |
| 35                                     | DCM   | F     | 53                       | 20 / --  | N         | Y       | N    | N            | Y        | N               | N   |               | x      |
| 36                                     | DCM   | M     | 59                       | NA       | Y         | NA      | NA   | NA           | NA       | NA              | N   |               | x      |
| 37                                     | DCM   | M     | 60                       | NA       | Y         | NA      | NA   | NA           | NA       | NA              | N   |               | x      |
| 38                                     | DCM   | F     | 60                       | 8 / --   | N         | Y       | Y    | NA           | Y        | N               | N   |               | x      |
| 39                                     | DCM   | M     | 62                       | 9 / --   | N         | Y       | Y    | N            | Y        | N               | N   |               | x      |
| 40                                     | DCM   | M     | 63                       | 20 / --  | N         | N       | Y    | Y            | Y        | N               | N   |               | x      |
| 41                                     | DCM   | M     | 65                       | NA       | Y         | NA      | Y    | NA           | Y        | NA              | N   |               | x      |
| 42                                     | DCM   | M     | 65                       | 7 / --   | N         | Y       | Y    | Y            | Y        | N               | N   |               | x      |
| 43                                     | DCM   | NA    | NA                       | NA       | Y         | NA      | NA   | NA           | NA       | NA              | N   |               | x      |
| <b>Histology</b>                       | NF    | 44% M | 48.3                     | 61 / --  | 78%       | 0%      | 0%   | 29%          | 0%       | 0%              | 0%  | x             |        |
|                                        | DCM   | 75% M | 40.3                     | 17 / --  | 50%       | 75%     | 75%  | 0%           | 100%     | 25%             | 0%  | x             |        |
| <b>RT-PCR</b>                          | NF    | 80% M | 53.5                     | 54 / --  | 40%       | 0%      | 0%   | 10%          | 0%       | 0%              | 0%  | x             |        |
|                                        | DCM   | 84% M | 45.4                     | 12 / 8.5 | 50%       | 73%     | 67%  | 55%          | 93%      | 18%             | 0%  | x             |        |
| <b>All Pts</b>                         | NF    | 63% M | 51                       | 57 / --  | 58%       | 0%      | 0%   | 7%           | 12%      | 0%              | 0%  |               |        |
|                                        | DCM   | 83% M | 45                       | 14 / --  | 50%       | 74%     | 68%  | 40%          | 95%      | 20%             | 0%  |               |        |

Table S2: Adult Patient Characteristics. Demographic data is divided by method. Average age of patients for histology: NF =48.3 yrs; DCM = 40.3 yrs. Average age of patients for RT-PCR: NF = 53.5yrs; DCM = 45.4 yrs. Average age of all patients studied: NF =51 yrs; DCM = 45yrs.

ID = Identification, NF = Non-Failing, DCM = Dilated Cardiomyopathy, M = Male, F = Female, ACEi = Angiotensin-Converting Enzyme Inhibitor, EF = Ejection Fraction, FS = Fractional Shortening, NA = Not Available, \*Inotropes include: Phosphodiesterase Inhibitors, Dobutamine, Dopamine, Epinephrine, Norepinephrine, Vasopressin.

| <b>Genes</b> | <b>Fold<br/>Difference</b> | <b>pvalue_ttest</b> | <b>qvalue_ttest</b> |
|--------------|----------------------------|---------------------|---------------------|
| CRYM         | 4.749224                   | 4.97E-08            | 0.000335            |
| C7orf41      | 2.021547                   | 3.93E-06            | 0.016991            |
| DHRS11       | 1.864701                   | 9.54E-06            | 0.016991            |
| PATZ1        | 1.427491                   | 1.01E-05            | 0.016991            |
| MGST3        | 1.583735                   | 1.58E-05            | 0.023666            |
| TSPAN9       | 1.840494                   | 2.83E-05            | 0.028915            |
| CD59         | -1.80022                   | 4.47E-05            | 0.028915            |
| USP11        | 1.553913                   | 4.63E-05            | 0.028915            |
| C5orf4       | 2.162673                   | 5.11E-05            | 0.028915            |
| GABRA4       | 2.665754                   | 5.15E-05            | 0.028915            |
| SCN2B        | 3.936666                   | 6.38E-05            | 0.033954            |
| KIAA1704     | 1.412964                   | 6.56E-05            | 0.033954            |
| TERF2IP      | 1.360332                   | 0.000106            | 0.041122            |
| PARP10       | 1.803806                   | 0.000122            | 0.041122            |
| TNFRSF25     | 2.045312                   | 0.000123            | 0.041122            |
| SLC25A27     | 2.156492                   | 0.000136            | 0.041122            |
| TMBIM6       | -1.69837                   | 0.000148            | 0.041122            |

|           |          |          |          |
|-----------|----------|----------|----------|
| IKBKAP    | 1.520965 | 0.00015  | 0.041122 |
| SGCG      | 2.079009 | 0.000152 | 0.041122 |
| BRP44L    | 1.637844 | 0.000155 | 0.041122 |
| GARNL3    | 2.569935 | 0.000157 | 0.041122 |
| POLL      | 1.56262  | 0.000158 | 0.041122 |
| SERPINA3  | -10.6163 | 0.00016  | 0.041122 |
| IL13RA1   | -1.64988 | 0.000165 | 0.041122 |
| GABARAPL2 | 1.431991 | 0.000176 | 0.041122 |
| KIAA0141  | 1.660347 | 0.000183 | 0.041122 |
| DYRK1B    | 2.244819 | 0.00021  | 0.041122 |
| ADPRHL1   | 1.77198  | 0.00021  | 0.041122 |
| PRDX6     | -1.94784 | 0.000211 | 0.041122 |
| EVL       | 1.651383 | 0.000227 | 0.041122 |
| TMEM53    | -1.73554 | 0.000235 | 0.041122 |
| TMEM71    | 2.471439 | 0.000241 | 0.041122 |
| CCND2     | 1.822956 | 0.000254 | 0.041122 |
| PLEKHG5   | 1.791263 | 0.000254 | 0.041122 |
| AGFG1     | -1.52907 | 0.000256 | 0.041122 |
| FGF1      | 2.821383 | 0.000262 | 0.041122 |
| CBY1      | 1.58102  | 0.00027  | 0.041122 |
| EPHX2     | 2.047747 | 0.000273 | 0.041122 |
| MBD2      | -1.42378 | 0.000276 | 0.041122 |
| MAPKAP1   | -1.34724 | 0.000278 | 0.041122 |
| FXR1      | 1.283883 | 0.000308 | 0.044161 |

|         |          |          |          |
|---------|----------|----------|----------|
| CDK10   | 1.459966 | 0.000346 | 0.045177 |
| KIF13A  | 1.775915 | 0.000356 | 0.045177 |
| PSIP1   | 1.360726 | 0.000361 | 0.045177 |
| CCDC28A | 1.719529 | 0.000368 | 0.045177 |
| TRIM45  | 2.513188 | 0.000384 | 0.045177 |
| COPS7B  | 1.437341 | 0.000389 | 0.045177 |
| DUSP28  | 1.75568  | 0.000389 | 0.045177 |
| GBF1    | -1.38676 | 0.00039  | 0.045177 |
| FGF18   | 3.404145 | 0.000391 | 0.045177 |
| TMEM189 | -1.71018 | 0.000401 | 0.045177 |
| F3      | 2.23608  | 0.000416 | 0.045177 |
| KCNJ4   | 2.715045 | 0.000419 | 0.045177 |
| IVD     | 1.818672 | 0.000419 | 0.045177 |
| KAT2A   | 1.841664 | 0.000455 | 0.047076 |
| APBB3   | 1.887443 | 0.000459 | 0.047076 |
| ZNF251  | 1.770439 | 0.000466 | 0.047076 |
| GNB3    | 2.216151 | 0.000471 | 0.047076 |
| GSPT1   | -1.41909 | 0.000472 | 0.047076 |
| LPCAT3  | -1.72504 | 0.000484 | 0.047504 |
| RGS11   | 2.642694 | 0.000487 | 0.047504 |
| MOAP1   | 1.425129 | 0.000514 | 0.047521 |
| ZNF83   | 1.772339 | 0.000519 | 0.047521 |
| SRP19   | -1.44175 | 0.000545 | 0.048272 |
| LRRC49  | 1.881689 | 0.000565 | 0.049107 |

|          |          |          |          |
|----------|----------|----------|----------|
| TSPAN32  | 2.478704 | 0.000578 | 0.04987  |
| S100A9   | -5.61279 | 0.000606 | 0.051663 |
| RALB     | -1.31486 | 0.00062  | 0.051663 |
| ARAP1    | 1.425866 | 0.000623 | 0.051663 |
| CTSB     | -2.36581 | 0.000637 | 0.051663 |
| WDR85    | 1.343471 | 0.000667 | 0.051865 |
| CPT1B    | 2.031206 | 0.00067  | 0.051865 |
| MPHOSPH8 | 1.496398 | 0.00068  | 0.05231  |
| TRUB1    | 1.983722 | 0.000689 | 0.052754 |
| SCO1     | 1.349414 | 0.000753 | 0.057295 |
| C4orf29  | 2.572275 | 0.000769 | 0.057498 |
| AMT      | 2.09619  | 0.000781 | 0.057498 |
| HIST1H1C | -2.61416 | 0.0008   | 0.058502 |
| SPATA20  | 1.79064  | 0.000806 | 0.058502 |
| SMPD1    | -1.45588 | 0.000812 | 0.058502 |
| MYO15B   | 1.672562 | 0.000822 | 0.058904 |
| PLA2G6   | 1.774898 | 0.000883 | 0.062287 |
| SNRPN    | 1.702524 | 0.000921 | 0.062691 |
| ZSCAN18  | 1.773762 | 0.000931 | 0.062691 |
| CEP85    | 1.602105 | 0.000962 | 0.064423 |
| WBP1     | 1.714048 | 0.00099  | 0.066015 |
| MYOM2    | 2.373334 | 0.001013 | 0.066631 |
| MYH6     | -14.0293 | 0.001016 | 0.066631 |
| SDSL     | 3.094428 | 0.001025 | 0.066631 |

|         |          |          |          |
|---------|----------|----------|----------|
| ALDH4A1 | 1.545211 | 0.001029 | 0.066631 |
| C5orf56 | 1.946275 | 0.001068 | 0.066788 |
| CDKN2D  | -1.91305 | 0.001093 | 0.066788 |
| MCFD2   | -1.39771 | 0.001096 | 0.066788 |
| SH2B1   | 1.489971 | 0.001126 | 0.066903 |
| HKR1    | 1.385446 | 0.001128 | 0.066903 |
| UNG     | 1.429551 | 0.001144 | 0.067266 |
| TTLL3   | 2.121872 | 0.001171 | 0.068146 |
| ARVCF   | 1.641259 | 0.001178 | 0.068146 |
| DNAJA2  | 1.148033 | 0.001179 | 0.068146 |
| AHSA2   | 1.765771 | 0.001204 | 0.069252 |
| EZR     | -1.54836 | 0.001214 | 0.069252 |
| TPCN1   | 1.880823 | 0.001325 | 0.072902 |
| HEY1    | 2.005798 | 0.001331 | 0.072902 |
| CAMK2B  | 1.585423 | 0.001343 | 0.072902 |
| ABCB6   | -1.64838 | 0.001376 | 0.073993 |
| ALDH9A1 | 1.453681 | 0.001378 | 0.073993 |
| UBA7    | 2.054142 | 0.001383 | 0.073993 |
| TMEM80  | 1.931193 | 0.001412 | 0.073993 |
| PALLD   | -2.87491 | 0.001412 | 0.073993 |
| PRKAA2  | 1.63896  | 0.00143  | 0.074635 |
| HSPB7   | -1.70243 | 0.001455 | 0.075647 |
| PIK3IP1 | 2.849155 | 0.00148  | 0.076352 |
| RBMX2   | 1.294998 | 0.001498 | 0.076995 |

|          |          |          |          |
|----------|----------|----------|----------|
| TCEB3    | -1.30707 | 0.001517 | 0.07765  |
| ARHGAP1  | 1.41007  | 0.001526 | 0.077814 |
| NME2     | -1.65723 | 0.001626 | 0.080624 |
| PPPDE2   | -1.58932 | 0.00163  | 0.080624 |
| DEGS1    | -1.73398 | 0.001647 | 0.080624 |
| DIP2A    | 1.513042 | 0.001664 | 0.080624 |
| RBP7     | 1.724376 | 0.001671 | 0.080656 |
| UPF3A    | 1.294183 | 0.001693 | 0.081123 |
| PARM1    | 1.47332  | 0.001726 | 0.082404 |
| CYP2J2   | 2.321419 | 0.00174  | 0.082745 |
| C10orf71 | 1.993204 | 0.001751 | 0.082745 |
| GPATCH4  | -2.01721 | 0.001801 | 0.082986 |
| STX16    | 1.517613 | 0.001818 | 0.082986 |
| TANK     | -1.45403 | 0.001913 | 0.084785 |
| TJAP1    | 1.312404 | 0.00192  | 0.084785 |
| CGNL1    | 2.3127   | 0.00195  | 0.085802 |
| SNX4     | -1.34444 | 0.001979 | 0.086808 |
| TNNI3    | 2.138972 | 0.002007 | 0.087727 |
| RAP1A    | -1.25724 | 0.002053 | 0.08897  |
| STRAP    | -1.283   | 0.002066 | 0.08897  |
| ING4     | 1.578133 | 0.002107 | 0.08897  |
| NIPA2    | -1.54838 | 0.002134 | 0.08897  |
| C5orf62  | -1.44584 | 0.00216  | 0.089152 |
| SMCR7    | 1.439469 | 0.002166 | 0.089152 |



|                   |          |          |          |
|-------------------|----------|----------|----------|
| EIF4EBP1          | -2.31004 | 0.002172 | 0.089152 |
| DERL1             | -1.55382 | 0.00219  | 0.089377 |
| CD53              | -2.58771 | 0.002225 | 0.090061 |
| ZNF775            | 1.68864  | 0.002232 | 0.090061 |
| TRIP12            | -1.23592 | 0.002234 | 0.090061 |
| SEC61A1           | -1.71184 | 0.002244 | 0.09021  |
| FAM200B           | 1.278677 | 0.002257 | 0.090446 |
| WDR48             | 1.403316 | 0.002264 | 0.090477 |
| SCRN2             | 1.866997 | 0.002332 | 0.092621 |
| PXDNL             | 1.748948 | 0.002341 | 0.092715 |
| CCND1             | 2.2606   | 0.002348 | 0.092715 |
| IRAK1             | -2.3931  | 0.002373 | 0.092769 |
| DVL2              | 1.372189 | 0.002377 | 0.092769 |
| C5orf53           | 1.606341 | 0.002393 | 0.093149 |
| JMJD7-<br>PLA2G4B | 2.105183 | 0.002423 | 0.09375  |
| SLC27A1           | 1.721838 | 0.002455 | 0.094358 |
| AAAS              | 1.418137 | 0.002459 | 0.094358 |
| RAMP1             | -2.51219 | 0.002471 | 0.094519 |
| AACS              | -1.47843 | 0.00252  | 0.094644 |
| TMED4             | 1.404547 | 0.002524 | 0.094644 |
| LYVE1             | -4.11258 | 0.002525 | 0.094644 |
| NID1              | -1.91158 | 0.002535 | 0.094644 |
| C16orf58          | 1.441508 | 0.00255  | 0.094644 |
| EIF4A2            | 1.415498 | 0.002563 | 0.094644 |

|          |          |          |          |
|----------|----------|----------|----------|
| TNNT3    | 2.133428 | 0.002567 | 0.094644 |
| TEX2     | -1.3101  | 0.002576 | 0.094644 |
| MVP      | -1.70725 | 0.002577 | 0.094644 |
| COL21A1  | 2.56578  | 0.002592 | 0.094644 |
| SRGN     | -1.87411 | 0.002594 | 0.094644 |
| CASD1    | 1.352706 | 0.002597 | 0.094644 |
| C1orf123 | 1.336391 | 0.002601 | 0.094644 |
| FGGY     | 1.912783 | 0.002615 | 0.094666 |
| MYL2     | 1.807778 | 0.002639 | 0.095255 |
| ERBB2    | -1.54718 | 0.002661 | 0.095548 |
| PACSIN3  | 1.3915   | 0.002693 | 0.095921 |
| PARVB    | -1.75216 | 0.002767 | 0.096198 |
| IWS1     | -1.20031 | 0.002778 | 0.096198 |
| SYNE1    | 1.372619 | 0.002814 | 0.096198 |
| C19orf51 | 5.565052 | 0.002832 | 0.096198 |
| SIRT5    | 1.617265 | 0.002835 | 0.096198 |
| DUT      | 1.393314 | 0.002846 | 0.096198 |
| DHX32    | 1.222402 | 0.002857 | 0.096198 |
| GPRASP2  | 1.576811 | 0.002857 | 0.096198 |
| EIF5A    | -1.57202 | 0.002857 | 0.096198 |
| KCMF1    | -1.30492 | 0.002892 | 0.096811 |
| ABHD11   | 1.781716 | 0.002919 | 0.096811 |
| CTNNA1   | -1.38399 | 0.002928 | 0.096887 |
| HSPA14   | -1.50179 | 0.002962 | 0.097747 |

|          |          |          |          |
|----------|----------|----------|----------|
| PLIN2    | -2.6633  | 0.00301  | 0.098473 |
| ADAMTSL5 | 1.83649  | 0.003019 | 0.098473 |
| KLF2     | 1.777041 | 0.003033 | 0.098473 |
| MYH7B    | 1.802147 | 0.003034 | 0.098473 |
| C7orf58  | 1.703889 | 0.003035 | 0.098473 |
| TGM2     | -2.52547 | 0.003072 | 0.0992   |
| VPS8     | 1.71041  | 0.003122 | 0.100086 |
| SCARB2   | -1.58195 | 0.003129 | 0.100086 |
| LMOD2    | 1.965744 | 0.003168 | 0.101099 |
| EFTUD2   | -1.38738 | 0.003259 | 0.103512 |
| PPOX     | 1.652085 | 0.003275 | 0.103535 |
| TBC1D1   | -1.57626 | 0.00331  | 0.104398 |
| TLN2     | 1.399484 | 0.003366 | 0.105024 |
| HAGH     | 1.375217 | 0.003369 | 0.105024 |
| RAB28    | 1.56433  | 0.003377 | 0.105024 |
| SGSM2    | 1.50843  | 0.003405 | 0.10541  |
| VWC2     | 1.554715 | 0.003451 | 0.106581 |
| PPP2R5A  | -1.30412 | 0.003499 | 0.106756 |
| C20orf24 | -1.52285 | 0.00352  | 0.106756 |
| LIN7B    | 1.818434 | 0.003525 | 0.106756 |
| G6PD     | -1.96051 | 0.003528 | 0.106756 |
| C1orf212 | -1.75645 | 0.003644 | 0.109522 |
| PRKCD    | -2.14322 | 0.003725 | 0.111481 |
| QSOX1    | -2.45335 | 0.003775 | 0.112454 |

|          |          |          |          |
|----------|----------|----------|----------|
| GATA6    | 1.565644 | 0.003802 | 0.113023 |
| COL7A1   | 2.237964 | 0.003811 | 0.113043 |
| ASB18    | 3.554396 | 0.003892 | 0.114227 |
| ST13     | 1.209285 | 0.003898 | 0.114227 |
| EML2     | 1.398095 | 0.003902 | 0.114227 |
| SCN4B    | 1.959685 | 0.003954 | 0.114657 |
| IDI2-AS1 | 2.960528 | 0.004006 | 0.114657 |
| TEAD2    | -1.63719 | 0.004007 | 0.114657 |
| SERPINI1 | 1.916747 | 0.00401  | 0.114657 |
| PCNX     | -1.46271 | 0.004067 | 0.115524 |
| LDHA     | -3.21847 | 0.004105 | 0.115524 |
| B3GALTL  | 1.681016 | 0.004146 | 0.115524 |
| IFT27    | 1.49543  | 0.004157 | 0.115524 |
| ACTG1    | -1.54536 | 0.004169 | 0.115524 |
| WDR90    | 1.464514 | 0.004178 | 0.115526 |
| C1orf63  | 1.601341 | 0.004194 | 0.115545 |
| SAMHD1   | -2.16751 | 0.004201 | 0.115545 |
| P4HTM    | 1.400517 | 0.004213 | 0.115545 |
| ADAM33   | 2.266181 | 0.004238 | 0.115757 |
| HTRA1    | 2.124277 | 0.004263 | 0.116199 |
| SLC25A11 | 1.443786 | 0.004348 | 0.117607 |
| SEMA6C   | 1.366468 | 0.00443  | 0.117607 |
| HMOX2    | -2.55994 | 0.004445 | 0.117607 |
| COQ5     | 1.289121 | 0.004451 | 0.117607 |

|          |          |          |          |
|----------|----------|----------|----------|
| POLR3F   | 1.448094 | 0.004458 | 0.117607 |
| MIB2     | 2.005538 | 0.0045   | 0.117607 |
| SRPX     | -1.55657 | 0.004521 | 0.117607 |
| ATG16L2  | 1.659612 | 0.004532 | 0.117607 |
| TMED10   | -1.39105 | 0.004539 | 0.117607 |
| JAK2     | 2.248753 | 0.004562 | 0.117607 |
| EIF4EBP3 | 3.659676 | 0.004569 | 0.117607 |
| WRNIP1   | 1.352863 | 0.004632 | 0.117607 |
| OBSCN    | 1.575215 | 0.00464  | 0.117607 |
| TMEM128  | 1.341962 | 0.004654 | 0.117607 |
| QDPR     | 1.469264 | 0.004666 | 0.117607 |
| DCUN1D5  | -1.30916 | 0.00468  | 0.117607 |
| CUX1     | 1.510668 | 0.004688 | 0.117607 |
| RHOBTB1  | 2.061174 | 0.004702 | 0.117607 |
| FN3K     | 1.472022 | 0.004707 | 0.117607 |
| CTSF     | 1.753421 | 0.00473  | 0.117956 |
| INADL    | 1.951588 | 0.004755 | 0.118351 |
| PDLIM1   | 1.343367 | 0.004771 | 0.118546 |
| ITIH5    | 2.181408 | 0.004853 | 0.119671 |
| DST      | 1.548574 | 0.004881 | 0.119671 |
| ECM2     | 2.487261 | 0.004888 | 0.119671 |
| LARP4B   | 1.46058  | 0.005056 | 0.123561 |
| S100A10  | -2.18077 | 0.005108 | 0.124603 |
| PPDPF    | 2.501478 | 0.005143 | 0.125176 |

|           |          |          |          |
|-----------|----------|----------|----------|
| SFRP1     | 4.902754 | 0.00515  | 0.125176 |
| ZBTB25    | 1.498261 | 0.005176 | 0.125395 |
| PLEKHA5   | 1.428949 | 0.00524  | 0.125395 |
| BBS2      | 1.652512 | 0.005288 | 0.125395 |
| KCNH2     | -1.55101 | 0.005289 | 0.125395 |
| ACAD8     | 1.311515 | 0.005299 | 0.125395 |
| ATPIF1    | 1.944781 | 0.005328 | 0.125395 |
| SORBS2    | 1.985087 | 0.005354 | 0.125395 |
| C16orf53  | 1.465945 | 0.005431 | 0.126759 |
| C22orf39  | 1.354022 | 0.005441 | 0.126759 |
| LAS1L     | 1.262219 | 0.005472 | 0.126761 |
| HAT1      | -1.18981 | 0.00549  | 0.126761 |
| SRSF5     | 1.450196 | 0.005507 | 0.126761 |
| CLK3      | 1.248153 | 0.005542 | 0.126812 |
| GNS       | -1.48189 | 0.005546 | 0.126812 |
| ATHL1     | 1.615725 | 0.005547 | 0.126812 |
| TTC28-AS1 | 1.301402 | 0.005588 | 0.127322 |
| SERTAD3   | -1.40399 | 0.005694 | 0.127591 |
| CBX7      | 1.734756 | 0.005702 | 0.127591 |
| TCEB1     | -1.38939 | 0.005713 | 0.127591 |
| RIMKLB    | 1.482687 | 0.005727 | 0.12768  |
| RNF207    | 1.792022 | 0.005777 | 0.127954 |
| PTS       | -1.30895 | 0.00581  | 0.127954 |
| CRADD     | 1.43059  | 0.005815 | 0.127954 |

|          |          |          |          |
|----------|----------|----------|----------|
| SHC1     | -1.46928 | 0.005815 | 0.127954 |
| ANKH     | 1.481273 | 0.005885 | 0.129277 |
| ZNF337   | 1.395818 | 0.00592  | 0.129475 |
| LRRC32   | -2.3219  | 0.005923 | 0.129475 |
| PCMTD2   | 1.502078 | 0.006028 | 0.13075  |
| SRRM2    | 1.298635 | 0.00604  | 0.13075  |
| RABGAP1L | 2.338101 | 0.006041 | 0.13075  |
| KIF22    | 1.557909 | 0.00607  | 0.13075  |
| PTDSS1   | -1.84059 | 0.006079 | 0.13075  |
| CHPT1    | -1.41827 | 0.006085 | 0.13075  |
| ATG14    | 1.375846 | 0.006106 | 0.13075  |
| SPTBN1   | 1.266998 | 0.006108 | 0.13075  |
| TM7SF2   | 3.139563 | 0.00612  | 0.13075  |
| RNF146   | 1.417727 | 0.006121 | 0.13075  |
| DSP      | -1.57474 | 0.006128 | 0.13075  |
| DPY19L2  | 1.866273 | 0.006136 | 0.13075  |
| WTIP     | 1.921225 | 0.006163 | 0.13079  |
| CFL1     | -1.79747 | 0.006181 | 0.13079  |
| CSAD     | 1.605175 | 0.006185 | 0.13079  |
| DPH3     | -1.66187 | 0.006187 | 0.13079  |
| ZNF480   | -1.4921  | 0.006203 | 0.130916 |
| UGGT1    | -1.51913 | 0.006241 | 0.130958 |
| MYOM1    | 1.865786 | 0.006243 | 0.130958 |
| NECAB3   | 1.524445 | 0.006352 | 0.132668 |

|         |          |          |          |
|---------|----------|----------|----------|
| TUBA1C  | -3.82994 | 0.00641  | 0.132668 |
| STAG3L4 | 1.371602 | 0.006428 | 0.132668 |
| TCN2    | -1.55161 | 0.006447 | 0.132668 |
| ITPK1   | -1.95596 | 0.006466 | 0.132668 |
| MUTYH   | 1.458082 | 0.006473 | 0.132668 |
| WDR27   | 1.617559 | 0.006525 | 0.133323 |
| PAAF1   | 1.475202 | 0.006568 | 0.134003 |
| ABCB7   | 1.26011  | 0.006578 | 0.134017 |
| INF2    | 1.535754 | 0.006659 | 0.135055 |
| GAS8    | 1.434768 | 0.006843 | 0.136915 |
| CLIC4   | -1.97887 | 0.006844 | 0.136915 |
| FERMT2  | -1.50105 | 0.006882 | 0.136915 |
| APBB1   | -1.4222  | 0.006894 | 0.136915 |
| ISCU    | 1.621552 | 0.006909 | 0.136915 |
| MAD2L2  | -1.53095 | 0.006916 | 0.136915 |
| MYL12A  | 2.477782 | 0.00692  | 0.136915 |
| AUH     | 1.482514 | 0.006931 | 0.136915 |
| DUSP13  | -2.06964 | 0.006934 | 0.136915 |
| RNF10   | -1.33706 | 0.006965 | 0.137052 |
| RFC2    | -1.29448 | 0.006972 | 0.137052 |
| S1PR3   | -3.32624 | 0.006982 | 0.137052 |
| ANKMY2  | 1.535112 | 0.007052 | 0.138237 |
| TMTC1   | -1.90477 | 0.007099 | 0.138665 |
| MAN2C1  | 1.389258 | 0.007105 | 0.138665 |



|          |          |          |          |
|----------|----------|----------|----------|
| HDAC10   | 1.689416 | 0.00713  | 0.138756 |
| RWDD1    | -1.38034 | 0.007175 | 0.138896 |
| C21orf34 | 1.714284 | 0.007205 | 0.138896 |
| CD163    | -4.12641 | 0.00721  | 0.138896 |
| GEMIN8   | 1.382513 | 0.007243 | 0.138932 |
| LENG8    | 1.854274 | 0.007332 | 0.140439 |
| EIF3I    | -1.58375 | 0.007401 | 0.141384 |
| EIF4G1   | -1.732   | 0.007465 | 0.141384 |
| KPNB1    | -1.32868 | 0.007508 | 0.141944 |
| GTF3A    | -1.60131 | 0.007524 | 0.141944 |
| RNF145   | -1.17891 | 0.007578 | 0.141944 |
| PSEN1    | -1.21805 | 0.007589 | 0.141944 |
| FAM180A  | 2.704337 | 0.007638 | 0.142652 |
| KAZALD1  | 2.979763 | 0.007663 | 0.142825 |
| ACYP2    | 1.419314 | 0.007669 | 0.142825 |
| ANAPC16  | 1.363049 | 0.007688 | 0.142825 |
| CAT      | 1.660445 | 0.00769  | 0.142825 |
| LCN12    | 2.716143 | 0.007706 | 0.142925 |
| CHRD     | 1.543302 | 0.007744 | 0.143431 |
| RANBP6   | -1.87146 | 0.007835 | 0.144536 |
| PLCD3    | -1.64472 | 0.007856 | 0.14461  |
| FYCO1    | 1.462347 | 0.007866 | 0.14461  |
| ACAP3    | 1.365382 | 0.007872 | 0.14461  |
| IFITM2   | -1.73684 | 0.007924 | 0.145366 |

|          |          |          |          |
|----------|----------|----------|----------|
| PSMD14   | -1.36557 | 0.007967 | 0.14597  |
| TMC6     | 1.614555 | 0.008051 | 0.147036 |
| FAM204A  | 1.32889  | 0.008139 | 0.147036 |
| MYCBP    | -1.64162 | 0.008151 | 0.147036 |
| COL6A3   | -2.0965  | 0.008169 | 0.147036 |
| PPIL1    | -1.79372 | 0.008184 | 0.147036 |
| PRUNE    | 1.401092 | 0.008185 | 0.147036 |
| ANO1     | 1.626598 | 0.008225 | 0.147036 |
| PLIN3    | -1.88893 | 0.008242 | 0.147036 |
| TFCP2    | 1.254838 | 0.008255 | 0.147036 |
| ATP2A2   | -2.04551 | 0.008319 | 0.14725  |
| KCTD12   | -1.28281 | 0.008343 | 0.14725  |
| TKT      | -1.98337 | 0.008386 | 0.14725  |
| C9orf24  | 2.437887 | 0.008423 | 0.14725  |
| OAZ2     | 1.498111 | 0.008424 | 0.14725  |
| IRF2BP2  | 1.47698  | 0.008433 | 0.14725  |
| CCNG1    | -1.73027 | 0.008445 | 0.14725  |
| PPFIA4   | 1.724916 | 0.008456 | 0.14725  |
| VSIG4    | -3.53418 | 0.008464 | 0.14725  |
| PPP1R14B | -2.27691 | 0.008499 | 0.147678 |
| FCER1G   | -2.68753 | 0.008566 | 0.148236 |
| APOA1    | 8.711584 | 0.008606 | 0.148236 |
| YIPF5    | -1.45476 | 0.008608 | 0.148236 |
| LUC7L3   | 1.575986 | 0.008629 | 0.148236 |

|          |          |          |          |
|----------|----------|----------|----------|
| DCAF11   | -1.36103 | 0.008762 | 0.148236 |
| GGT5     | -2.06881 | 0.008774 | 0.148236 |
| JMJD4    | 1.679968 | 0.008816 | 0.148236 |
| TES      | -1.9086  | 0.008822 | 0.148236 |
| MTRR     | -1.54393 | 0.008822 | 0.148236 |
| DPM1     | 1.316918 | 0.008828 | 0.148236 |
| ODF3B    | 1.863627 | 0.008835 | 0.148236 |
| RDH13    | 1.445255 | 0.008851 | 0.148236 |
| C21orf59 | 1.325981 | 0.008873 | 0.148236 |
| HSF4     | 2.128426 | 0.008876 | 0.148236 |
| RFTN1    | -1.3367  | 0.008886 | 0.148236 |
| CTNNBIP1 | -1.64588 | 0.00891  | 0.148236 |
| KIAA1191 | 1.383286 | 0.008928 | 0.148236 |
| NPEPL1   | 1.409906 | 0.008965 | 0.148309 |
| COL16A1  | 2.647851 | 0.00902  | 0.148506 |
| TSC1     | 1.301021 | 0.009032 | 0.148506 |
| FAM50B   | 1.531719 | 0.009032 | 0.148506 |
| PPP3CC   | -1.53685 | 0.009105 | 0.14879  |
| YIPF1    | -1.371   | 0.009108 | 0.14879  |
| HMGCL    | 1.441331 | 0.009116 | 0.14879  |
| ABCA10   | 2.60267  | 0.009267 | 0.151084 |
| LDB1     | 1.413604 | 0.009302 | 0.15119  |
| RAB1A    | -1.17861 | 0.009319 | 0.15119  |
| UTP11L   | -1.29611 | 0.009385 | 0.151907 |

|           |          |          |          |
|-----------|----------|----------|----------|
| WDR59     | 1.303372 | 0.009386 | 0.151907 |
| CDV3      | -1.4312  | 0.009472 | 0.152753 |
| AMD1      | -1.86489 | 0.009517 | 0.15311  |
| SRPR      | -1.22471 | 0.009594 | 0.153992 |
| SLC25A44  | -1.63874 | 0.00963  | 0.154019 |
| POLE3     | -1.28127 | 0.00963  | 0.154019 |
| BOC       | 1.798825 | 0.00971  | 0.15511  |
| NONO      | -1.17814 | 0.009758 | 0.155131 |
| ZMYM6NB   | 1.432182 | 0.009788 | 0.15543  |
| SAR1A     | -1.31342 | 0.009856 | 0.156084 |
| RG9MTD1   | -1.253   | 0.009866 | 0.156084 |
| AP4M1     | 1.27093  | 0.009877 | 0.156084 |
| TMEM43    | -1.74567 | 0.009887 | 0.156084 |
| AGPAT6    | -1.36588 | 0.00992  | 0.156221 |
| SLC2A1    | -3.7352  | 0.009927 | 0.156221 |
| IMPAD1    | -1.41748 | 0.009931 | 0.156221 |
| FYN       | 1.379298 | 0.009997 | 0.156239 |
| SNAPC5    | 1.320095 | 0.010039 | 0.156239 |
| DCAKD     | 1.37739  | 0.010054 | 0.156239 |
| C14orf159 | 1.514594 | 0.010059 | 0.156239 |
| ALOX5AP   | -3.08853 | 0.010118 | 0.156789 |
| ZNF76     | 1.474506 | 0.010157 | 0.157215 |
| CDH2      | 1.369965 | 0.010186 | 0.157222 |
| C6orf106  | -1.55024 | 0.010193 | 0.157222 |

|           |          |          |          |
|-----------|----------|----------|----------|
| GLT25D1   | -1.5262  | 0.010249 | 0.157734 |
| C1QBP     | 1.161156 | 0.010249 | 0.157734 |
| CD63      | -1.74639 | 0.01029  | 0.157995 |
| SPCS3     | -1.47151 | 0.010357 | 0.158845 |
| EIF2D     | 1.389196 | 0.010392 | 0.159026 |
| LDOC1L    | -1.43012 | 0.010453 | 0.159422 |
| NAAA      | 1.46694  | 0.010454 | 0.159422 |
| FARSB     | -1.35437 | 0.010508 | 0.159666 |
| DPY19L2P1 | 1.846738 | 0.010522 | 0.159666 |
| UBE2H     | 1.457874 | 0.010546 | 0.159666 |
| ABCD4     | 1.269539 | 0.010605 | 0.159666 |
| HYI       | 2.183948 | 0.010611 | 0.159666 |
| SYF2      | 1.299096 | 0.010617 | 0.159666 |
| SMYD2     | 1.582515 | 0.010643 | 0.159666 |
| ZFYVE21   | 1.292449 | 0.010648 | 0.159666 |
| TGFBR2    | -1.39059 | 0.01067  | 0.159666 |
| NDUFAF2   | -1.32641 | 0.010696 | 0.159666 |
| ZNF577    | 1.588645 | 0.010707 | 0.159666 |
| TRIAP1    | -1.23051 | 0.010738 | 0.159956 |
| UCKL1     | 1.342746 | 0.010768 | 0.160039 |
| JAK1      | -1.79401 | 0.010799 | 0.160328 |
| PPA1      | -1.49994 | 0.010842 | 0.160793 |
| EIF3J     | -1.55208 | 0.010873 | 0.160966 |
| BCL2L13   | -1.43549 | 0.010897 | 0.160966 |

|          |          |          |          |
|----------|----------|----------|----------|
| TMSB10   | -1.43527 | 0.010904 | 0.160966 |
| TFPI     | -1.77338 | 0.010968 | 0.160966 |
| SMTN     | 1.472438 | 0.010994 | 0.160966 |
| HDGF     | -1.3739  | 0.011008 | 0.160966 |
| NCKAP1   | -1.34501 | 0.011064 | 0.160966 |
| ACVRL1   | -1.91389 | 0.011085 | 0.160966 |
| NELF     | -1.66293 | 0.011093 | 0.160966 |
| TRIM41   | 1.391379 | 0.011161 | 0.161011 |
| HIGD1B   | 1.441472 | 0.011171 | 0.161011 |
| HM13     | -1.43843 | 0.01118  | 0.161011 |
| PITPNA   | -1.3631  | 0.011247 | 0.161813 |
| PA2G4    | -1.28604 | 0.011303 | 0.162437 |
| TCEA2    | 1.516806 | 0.011407 | 0.163571 |
| PRKRIP1  | 1.243438 | 0.011418 | 0.163571 |
| KIAA0100 | -1.34321 | 0.01145  | 0.163847 |
| NUP88    | -1.18031 | 0.011483 | 0.163879 |
| SVIL     | 1.546521 | 0.011501 | 0.163879 |
| PLP2     | -2.77009 | 0.011506 | 0.163879 |
| AFF1     | -1.63614 | 0.011526 | 0.163879 |
| ENO1     | -2.15452 | 0.011558 | 0.163879 |
| SRPRB    | -1.57249 | 0.011568 | 0.163879 |
| LRRC59   | -2.11872 | 0.011576 | 0.163879 |
| ZNF207   | -1.26093 | 0.011619 | 0.163879 |
| LETM1    | -1.61978 | 0.011622 | 0.163879 |

|          |          |          |          |
|----------|----------|----------|----------|
| LAPTM5   | -2.9856  | 0.011764 | 0.165698 |
| PRMT7    | 1.400572 | 0.011791 | 0.165739 |
| C12orf51 | 1.266411 | 0.011835 | 0.165744 |
| TNFRSF14 | 1.500153 | 0.011853 | 0.165744 |
| MAP2K1   | -1.81495 | 0.011891 | 0.165744 |
| GLOD4    | 1.407936 | 0.011912 | 0.165744 |
| CNDP2    | -1.31141 | 0.011934 | 0.165744 |
| TUBA3E   | -10.2254 | 0.01195  | 0.165744 |
| ECHDC2   | 1.58812  | 0.011973 | 0.165744 |
| MTERFD3  | 1.338293 | 0.011973 | 0.165744 |
| HEATR5A  | -1.3545  | 0.011974 | 0.165744 |
| EDEM2    | -1.65637 | 0.011988 | 0.165744 |
| LRRC20   | 1.410953 | 0.012032 | 0.165837 |
| CASP9    | 1.263922 | 0.012103 | 0.166469 |
| CCS      | 1.620463 | 0.012147 | 0.166553 |
| DCTN6    | 1.303686 | 0.012192 | 0.166553 |
| PSMD11   | -1.31591 | 0.012302 | 0.166553 |
| ACCS     | 1.854287 | 0.01231  | 0.166553 |
| NDUFA10  | 1.414394 | 0.012329 | 0.166553 |
| COTL1    | -2.20028 | 0.012396 | 0.166553 |
| BIRC2    | -1.07368 | 0.012421 | 0.166553 |
| SETMAR   | 1.36032  | 0.012446 | 0.166553 |
| DMD      | 1.357583 | 0.01246  | 0.166553 |
| UBE2J1   | -1.52195 | 0.012493 | 0.166553 |

|         |          |          |          |
|---------|----------|----------|----------|
| WNK1    | -1.45981 | 0.012517 | 0.166553 |
| SNRPG   | -1.37288 | 0.012546 | 0.166781 |
| SDHD    | 1.263349 | 0.012567 | 0.166896 |
| TPRKB   | -1.31513 | 0.012626 | 0.167457 |
| NCDN    | 1.218308 | 0.012669 | 0.167457 |
| ETF1    | -1.52583 | 0.012672 | 0.167457 |
| MPZL1   | -1.34984 | 0.01275  | 0.167998 |
| KBTBD10 | -1.83684 | 0.012875 | 0.168863 |
| PMM2    | -1.89262 | 0.012914 | 0.168863 |
| CRBN    | 1.404579 | 0.012938 | 0.168863 |
| CHMP5   | 1.184152 | 0.01295  | 0.168863 |
| NUDT4   | -2.16359 | 0.01298  | 0.168863 |
| KPNA2   | -2.20948 | 0.012981 | 0.168863 |
| PNISR   | 1.529391 | 0.013008 | 0.168863 |
| EXOC6B  | 1.479723 | 0.013027 | 0.168863 |
| IRX6    | 3.669494 | 0.013091 | 0.168863 |
| WBSCR16 | 1.230923 | 0.013093 | 0.168863 |
| ELK1    | -1.62946 | 0.013119 | 0.168863 |
| SFRP4   | 6.189337 | 0.013149 | 0.168863 |
| NT5DC2  | -1.73828 | 0.013168 | 0.168863 |
| C6orf57 | 1.381447 | 0.013215 | 0.168863 |
| BMS1    | -1.35115 | 0.013219 | 0.168863 |
| LAMP2   | -1.3229  | 0.013224 | 0.168863 |
| COX7A2L | 1.282322 | 0.013258 | 0.168863 |



|          |          |          |          |
|----------|----------|----------|----------|
| LCN10    | -2.72416 | 0.013266 | 0.168863 |
| BTN3A2   | 1.633274 | 0.013306 | 0.168863 |
| BEX4     | 1.397892 | 0.013313 | 0.168863 |
| MCRS1    | -1.24136 | 0.013326 | 0.168863 |
| MFN2     | 1.31123  | 0.01334  | 0.168863 |
| CHKB     | 1.581767 | 0.013345 | 0.168863 |
| ZYX      | -1.80202 | 0.013361 | 0.168863 |
| TNFRSF1A | -2.41009 | 0.013394 | 0.168863 |
| MBP      | 2.016226 | 0.013405 | 0.168863 |
| YWHAZ    | -1.32416 | 0.013482 | 0.16888  |
| C22orf40 | 1.799496 | 0.013514 | 0.169126 |
| USP21    | 1.22024  | 0.013612 | 0.170038 |
| DIABLO   | -1.17545 | 0.01372  | 0.170751 |
| FBXO40   | 1.70739  | 0.013844 | 0.172042 |
| CIAPIN1  | -1.36506 | 0.013925 | 0.172042 |
| FAHD2A   | 1.27951  | 0.013954 | 0.172042 |
| LRCH4    | -1.27754 | 0.013962 | 0.172042 |
| S100A16  | -1.6417  | 0.013969 | 0.172042 |
| UBE2L3   | -1.19928 | 0.013992 | 0.172042 |
| DNAJC19  | 1.296863 | 0.014023 | 0.172042 |
| ENTPD4   | -1.63044 | 0.014041 | 0.172042 |
| COQ4     | 1.31853  | 0.01417  | 0.173471 |
| DDX46    | -1.29033 | 0.014183 | 0.173471 |
| NAA15    | -1.6287  | 0.014218 | 0.173739 |

|          |          |          |          |
|----------|----------|----------|----------|
| PHACTR1  | -1.66194 | 0.014268 | 0.174185 |
| TNRC6A   | 1.347738 | 0.014362 | 0.174784 |
| CNNM3    | 1.561564 | 0.014424 | 0.174784 |
| LTBP1    | 1.456862 | 0.014464 | 0.174784 |
| PNPLA7   | 2.113922 | 0.014472 | 0.174784 |
| RBM24    | 1.581847 | 0.014511 | 0.174784 |
| SMARCA2  | 1.310903 | 0.014541 | 0.174784 |
| HFE2     | 5.626627 | 0.014563 | 0.174784 |
| ZNF692   | 1.561135 | 0.01468  | 0.175536 |
| C1orf35  | 1.892681 | 0.014687 | 0.175536 |
| ANKRD46  | 1.43327  | 0.014691 | 0.175536 |
| ARHGDIG  | 2.648617 | 0.014704 | 0.175536 |
| PPM1G    | -1.30972 | 0.014747 | 0.175891 |
| PRMT2    | 1.503651 | 0.014806 | 0.176281 |
| SATB1    | 1.646503 | 0.014845 | 0.176281 |
| SREBF1   | -2.76637 | 0.014917 | 0.17682  |
| C16orf80 | 1.320052 | 0.014979 | 0.177402 |
| SH3GLB2  | 1.565446 | 0.01501  | 0.177613 |
| NAGA     | -1.55796 | 0.015052 | 0.17795  |
| FAM98C   | 1.696235 | 0.015099 | 0.178055 |
| MFSD1    | -1.63448 | 0.0151   | 0.178055 |
| C1orf97  | 1.616868 | 0.015189 | 0.178315 |
| CAPN1    | -1.27276 | 0.015243 | 0.178315 |
| SUCLG2   | 1.350987 | 0.01525  | 0.178315 |

|         |          |          |          |
|---------|----------|----------|----------|
| POGZ    | 1.571719 | 0.015308 | 0.178315 |
| LARP1B  | -1.45709 | 0.015321 | 0.178315 |
| AQP3    | -3.78684 | 0.015343 | 0.178419 |
| SNRNP70 | 1.412851 | 0.01537  | 0.178467 |
| NRBP2   | 1.545037 | 0.015374 | 0.178467 |
| HIRIP3  | 1.316042 | 0.015394 | 0.178547 |
| TUBA3D  | -12.4404 | 0.015413 | 0.178614 |
| FBXO44  | 1.750345 | 0.015509 | 0.179075 |
| GRIP2   | 1.621768 | 0.015574 | 0.179075 |
| S100A11 | -2.14058 | 0.015587 | 0.179075 |
| ACAD9   | 1.217361 | 0.015588 | 0.179075 |
| TBX5    | 1.561281 | 0.015612 | 0.179075 |
| PRKAR1A | 1.446077 | 0.015653 | 0.179087 |
| SMOC2   | 2.165419 | 0.015695 | 0.17926  |
| CCDC47  | -1.34868 | 0.015797 | 0.17964  |
| MRPL3   | -1.43455 | 0.015822 | 0.17964  |
| RHOA    | -1.28477 | 0.015824 | 0.17964  |
| CTF1    | 1.776313 | 0.015857 | 0.17964  |
| PDE1C   | 1.470373 | 0.015898 | 0.17964  |
| ADHFE1  | 1.497876 | 0.01591  | 0.17964  |
| THRA    | 1.352441 | 0.015928 | 0.17964  |
| MLYCD   | 1.679203 | 0.016015 | 0.180343 |
| WDPCP   | 1.632665 | 0.016017 | 0.180343 |
| PREPL   | 1.50048  | 0.016173 | 0.180507 |

|          |          |          |          |
|----------|----------|----------|----------|
| C15orf24 | -1.34208 | 0.016179 | 0.180507 |
| PHYH     | 1.323911 | 0.016278 | 0.180507 |
| EXD3     | 1.531829 | 0.016288 | 0.180507 |
| CCDC159  | 1.51078  | 0.016294 | 0.180507 |
| AASS     | -2.35138 | 0.016358 | 0.180507 |
| PAR3     | -1.50085 | 0.016375 | 0.180507 |
| ACYP1    | 1.449421 | 0.01645  | 0.180507 |
| DDX19A   | -1.17518 | 0.01645  | 0.180507 |
| MARK3    | -1.86314 | 0.016461 | 0.180507 |
| C3orf45  | 1.752497 | 0.016515 | 0.180698 |
| PDCD10   | -1.26659 | 0.016572 | 0.180698 |
| PRICKLE1 | 1.617971 | 0.016586 | 0.180698 |
| EFHD1    | 1.380715 | 0.01662  | 0.180776 |
| BCKDHA   | 1.472323 | 0.016731 | 0.181692 |
| PTN      | 2.810532 | 0.01688  | 0.183161 |
| S100A8   | -4.24132 | 0.016911 | 0.18335  |
| USP20    | 1.35051  | 0.017054 | 0.184155 |
| KCNIP2   | -6.06647 | 0.017122 | 0.184155 |
| INMT     | 1.811763 | 0.01729  | 0.185663 |
| LRP5     | 2.091204 | 0.017313 | 0.185705 |
| TNNT1    | 2.209264 | 0.017385 | 0.185705 |
| SAP30    | -1.34132 | 0.017407 | 0.185705 |
| FKBP5    | -4.11516 | 0.017467 | 0.185705 |
| ME3      | 1.417752 | 0.017467 | 0.185705 |

|        |          |          |          |
|--------|----------|----------|----------|
| DDX39A | -1.64088 | 0.017495 | 0.185705 |
| SNAP47 | 2.403837 | 0.0175   | 0.185705 |
| HUS1   | -1.39699 | 0.017565 | 0.18596  |
| PYCR2  | 1.204519 | 0.017583 | 0.18596  |
| TRMT2A | 1.443169 | 0.017593 | 0.18596  |
| NME1   | -2.36901 | 0.0177   | 0.186766 |
| MTCH2  | -1.30834 | 0.017711 | 0.186766 |
| LTV1   | -1.33551 | 0.017742 | 0.186942 |
| HMGN2  | 2.206519 | 0.017825 | 0.187675 |
| TMEM19 | -1.6518  | 0.017853 | 0.187821 |
| ZNF704 | 1.790577 | 0.017918 | 0.188354 |
| GRB14  | -2.08398 | 0.017939 | 0.188428 |
| UBE4B  | 1.242476 | 0.018035 | 0.188871 |
| TCP1   | -1.33798 | 0.018042 | 0.188871 |
| DTX3   | 1.411177 | 0.01818  | 0.188871 |
| LCN6   | -3.24908 | 0.018184 | 0.188871 |
| TRAP1  | 1.235542 | 0.018246 | 0.188871 |
| UBAP2  | -1.29781 | 0.018247 | 0.188871 |
| TARS2  | 1.363249 | 0.018253 | 0.188871 |
| NR2C1  | 1.418896 | 0.018255 | 0.188871 |
| SHQ1   | -1.49791 | 0.018294 | 0.188871 |
| TATDN2 | -1.24087 | 0.018297 | 0.188871 |
| AFMID  | 1.401217 | 0.018322 | 0.188871 |
| CLSTN1 | 1.339191 | 0.018334 | 0.188871 |

|          |          |          |          |
|----------|----------|----------|----------|
| TMX2     | -1.3042  | 0.018408 | 0.188871 |
| C17orf91 | -2.17485 | 0.018427 | 0.188871 |
| ZCCHC17  | 1.296887 | 0.018429 | 0.188871 |
| CIRBP    | 1.396398 | 0.018434 | 0.188871 |
| UBE2K    | -1.2612  | 0.018458 | 0.188871 |
| CDK2AP2  | -1.88821 | 0.018511 | 0.189272 |
| TUBGCP6  | 1.34316  | 0.018614 | 0.190152 |
| HNRNPH2  | -1.16603 | 0.018642 | 0.190152 |
| AVEN     | -1.70086 | 0.018654 | 0.190152 |
| CES2     | -1.65611 | 0.018699 | 0.190183 |
| CHRAC1   | -1.41585 | 0.018779 | 0.190214 |
| PTP4A2   | -2.1592  | 0.018785 | 0.190214 |
| IFITM3   | -1.73442 | 0.018796 | 0.190214 |
| PTEN     | -1.32135 | 0.018801 | 0.190214 |
| TMEM159  | 1.726147 | 0.018835 | 0.190386 |
| CYB5R1   | 1.390877 | 0.018846 | 0.190386 |
| VPS13D   | -2.49149 | 0.018907 | 0.190716 |
| ARF3     | -1.49631 | 0.018964 | 0.19114  |
| TNK2     | 1.548777 | 0.019025 | 0.191468 |
| GHITM    | 1.135925 | 0.019042 | 0.1915   |
| C9orf37  | 1.378702 | 0.019067 | 0.191607 |
| FHL3     | -1.55905 | 0.019109 | 0.191891 |
| LYPLAL1  | 1.480582 | 0.019206 | 0.19259  |
| P4HB     | -1.36524 | 0.019208 | 0.19259  |

|         |          |          |          |
|---------|----------|----------|----------|
| ATXN7L3 | -1.37707 | 0.019243 | 0.192661 |
| NFYB    | -1.28787 | 0.019355 | 0.193633 |
| FBXL22  | 1.547037 | 0.019438 | 0.19409  |
| C3orf78 | 1.340032 | 0.019453 | 0.19409  |
| TXNRD1  | -1.93972 | 0.019501 | 0.19409  |
| LEMD2   | 1.159387 | 0.01959  | 0.194685 |
| SNRPB   | -1.59804 | 0.019672 | 0.195211 |
| PLEKHO1 | -1.89588 | 0.019693 | 0.195272 |
| ABCD3   | -1.45216 | 0.019772 | 0.195515 |
| HNRNPAB | -1.45491 | 0.019775 | 0.195515 |
| PPFIBP2 | 1.368539 | 0.019798 | 0.195602 |
| RPN2    | -1.67222 | 0.019883 | 0.195833 |
| TRPM4   | 1.388478 | 0.019924 | 0.195833 |
| ACVR1   | -1.33282 | 0.019935 | 0.195833 |
| PANK2   | -1.28021 | 0.019953 | 0.195833 |
| WDR6    | 1.216052 | 0.019967 | 0.195833 |
| TIMM17A | -1.31152 | 0.020143 | 0.197411 |
| RAD1    | -1.38554 | 0.020333 | 0.198881 |
| PVRL2   | -1.58213 | 0.020352 | 0.198881 |
| ACSL3   | -1.39911 | 0.020421 | 0.199267 |
| ME1     | -1.33771 | 0.020458 | 0.19948  |
| HDLBP   | -1.19063 | 0.020496 | 0.1995   |
| NPTXR   | 1.368201 | 0.020538 | 0.1995   |
| WDR77   | -1.31715 | 0.020553 | 0.1995   |

|          |          |          |          |
|----------|----------|----------|----------|
| IL11RA   | 1.471697 | 0.020563 | 0.1995   |
| STXBP6   | -1.72872 | 0.02064  | 0.199935 |
| LTBP4    | 2.624171 | 0.02068  | 0.199935 |
| TMEM175  | 1.459542 | 0.020682 | 0.199935 |
| EIF4E    | -1.43073 | 0.020776 | 0.200171 |
| USP10    | -1.18107 | 0.020777 | 0.200171 |
| PSME3    | -1.42626 | 0.020804 | 0.200171 |
| C16orf45 | 1.499756 | 0.020826 | 0.200171 |
| PCGF5    | -1.47225 | 0.020883 | 0.200513 |
| PCCB     | 1.421542 | 0.020923 | 0.200513 |
| MDFIC    | 1.617262 | 0.020972 | 0.200513 |
| PDCD11   | -1.59379 | 0.020998 | 0.200513 |
| KIF9     | 1.439111 | 0.02101  | 0.200513 |
| CDC37L1  | -1.51777 | 0.021047 | 0.200705 |
| ADAMTS15 | -2.3057  | 0.021077 | 0.200705 |
| LEPREL2  | 1.675833 | 0.021123 | 0.200705 |
| PANK3    | -2.13669 | 0.02113  | 0.200705 |
| CD14     | -3.04263 | 0.02115  | 0.200705 |
| MTUS2    | -1.60684 | 0.021205 | 0.200945 |
| TSTD1    | 1.952276 | 0.021407 | 0.201052 |
| EZH1     | 1.380191 | 0.021435 | 0.201052 |
| PLCG1    | 1.433884 | 0.02148  | 0.201052 |
| SLC2A4RG | 1.488584 | 0.021523 | 0.201052 |
| MORF4L2  | -1.33162 | 0.021559 | 0.201052 |



|           |          |          |          |
|-----------|----------|----------|----------|
| RRP36     | -1.27848 | 0.021673 | 0.20197  |
| C20orf194 | 1.325013 | 0.021747 | 0.202516 |
| RAD21     | 1.288223 | 0.021802 | 0.202895 |
| TIMP1     | -3.81958 | 0.02183  | 0.203015 |
| ITGB1BP2  | -1.38883 | 0.021853 | 0.20309  |
| H2AFZ     | -1.8443  | 0.021948 | 0.203686 |
| CAMLG     | 1.329002 | 0.022062 | 0.203686 |
| IMPDH1    | -1.53237 | 0.022093 | 0.203686 |
| ACAD10    | 1.397392 | 0.022144 | 0.203686 |
| CPE       | 1.323495 | 0.02215  | 0.203686 |
| ITGA7     | -1.51582 | 0.022161 | 0.203686 |
| F11R      | -1.55422 | 0.022185 | 0.203686 |
| ANAPC7    | -1.19029 | 0.02219  | 0.203686 |
| GALNT11   | 1.327043 | 0.022218 | 0.203804 |
| TBC1D17   | 1.417288 | 0.022293 | 0.204103 |
| SLC39A1   | -1.69958 | 0.022323 | 0.204103 |
| LEPREL1   | 3.74613  | 0.022326 | 0.204103 |
| CCT5      | -1.50682 | 0.022504 | 0.205167 |
| CHTOP     | 1.146872 | 0.022507 | 0.205167 |
| SNURF     | 1.348767 | 0.022519 | 0.205167 |
| STIP1     | -1.5414  | 0.022629 | 0.206031 |
| DUSP26    | 1.723074 | 0.022699 | 0.206067 |
| B4GALT5   | -1.59719 | 0.022699 | 0.206067 |
| HMBS      | -1.58229 | 0.022712 | 0.206067 |

|         |          |          |          |
|---------|----------|----------|----------|
| TSPAN17 | -1.4522  | 0.02274  | 0.206067 |
| EIF2S2  | -1.35002 | 0.022784 | 0.206166 |
| CSDC2   | -2.49119 | 0.022835 | 0.206166 |
| SDHA    | 1.338659 | 0.02286  | 0.206166 |
| CCNL2   | 1.269696 | 0.022878 | 0.206166 |
| DLD     | 1.267788 | 0.022923 | 0.206166 |
| POP5    | 1.397325 | 0.022941 | 0.206166 |
| FAM120B | 1.267606 | 0.022952 | 0.206166 |
| RPL7L1  | -1.26344 | 0.023014 | 0.206166 |
| ZNHIT3  | 1.293963 | 0.02303  | 0.206166 |
| ST3GAL1 | -1.61278 | 0.02304  | 0.206166 |
| SSU72   | -1.27748 | 0.023146 | 0.206166 |
| SH3YL1  | 1.455503 | 0.023152 | 0.206166 |
| C7orf50 | 1.795278 | 0.023189 | 0.206166 |
| CHMP4B  | -1.36787 | 0.023218 | 0.206166 |
| FTSJ1   | -1.52732 | 0.023226 | 0.206166 |
| ARHGEF6 | 1.393564 | 0.023234 | 0.206166 |
| PPP4R1  | -1.26323 | 0.023265 | 0.206166 |
| RPL3L   | 1.275649 | 0.023278 | 0.206166 |
| PARP3   | 1.37371  | 0.023317 | 0.206166 |
| UBE2F   | -1.2666  | 0.023317 | 0.206166 |
| TUBB6   | -2.09929 | 0.023334 | 0.206166 |
| DHPS    | 1.255903 | 0.023349 | 0.206166 |
| CMTM5   | -20.1809 | 0.023358 | 0.206166 |

|           |          |          |          |
|-----------|----------|----------|----------|
| STAT3     | -3.03214 | 0.023381 | 0.206166 |
| C1orf105  | -9.77318 | 0.023394 | 0.206166 |
| GDI2      | -1.25605 | 0.023471 | 0.206575 |
| FZD1      | 1.714766 | 0.023531 | 0.206611 |
| CD164     | -1.54995 | 0.023567 | 0.206611 |
| METTL22   | -1.64127 | 0.023609 | 0.206692 |
| GMPPB     | -1.42699 | 0.023622 | 0.206692 |
| FLII      | -1.40303 | 0.023663 | 0.206721 |
| SYMPK     | 1.326037 | 0.023666 | 0.206721 |
| ANXA5     | -1.59613 | 0.023672 | 0.206721 |
| C19orf47  | -1.57355 | 0.023709 | 0.206913 |
| C17orf108 | 1.671299 | 0.023972 | 0.209076 |
| ANP32E    | 1.323974 | 0.024093 | 0.209209 |
| RPN1      | -1.46489 | 0.024122 | 0.209209 |
| APRT      | -1.47884 | 0.024143 | 0.209209 |
| XPO7      | 1.21989  | 0.024201 | 0.209209 |
| RAB8A     | -1.27996 | 0.024231 | 0.209209 |
| MAPRE1    | -1.24047 | 0.024257 | 0.209209 |
| FCN3      | -3.77884 | 0.024258 | 0.209209 |
| TXNIP     | 1.65602  | 0.024277 | 0.209209 |
| FAM63A    | 1.452722 | 0.024322 | 0.209209 |
| CTPS      | -1.82728 | 0.024332 | 0.209209 |
| RANGAP1   | -1.79381 | 0.024333 | 0.209209 |
| FN3KRP    | 1.323927 | 0.024361 | 0.209209 |

|          |          |          |          |
|----------|----------|----------|----------|
| CNBP     | 1.228078 | 0.024392 | 0.209209 |
| ATOH8    | 1.818078 | 0.024412 | 0.209246 |
| FURIN    | -1.91212 | 0.024486 | 0.209751 |
| YKT6     | -1.42136 | 0.024517 | 0.209884 |
| PSMD7    | -1.22717 | 0.024652 | 0.210904 |
| IFRD2    | -1.32427 | 0.024685 | 0.211052 |
| NPDC1    | 1.700937 | 0.024828 | 0.211954 |
| FLYWCH1  | 1.608765 | 0.024926 | 0.211954 |
| KPNA1    | -1.61162 | 0.025007 | 0.211954 |
| ANXA2    | -1.84962 | 0.025008 | 0.211954 |
| MAST4    | -1.22773 | 0.025024 | 0.211954 |
| ECE1     | -1.35458 | 0.025052 | 0.211954 |
| CPSF1    | 1.5152   | 0.025058 | 0.211954 |
| TUBB2C   | -1.91327 | 0.025107 | 0.212234 |
| C2orf56  | -1.30976 | 0.025164 | 0.212447 |
| FAM165B  | 1.360569 | 0.025241 | 0.212964 |
| ISG20L2  | -1.37205 | 0.025353 | 0.213411 |
| SEC13    | -1.24218 | 0.025373 | 0.213411 |
| SOBP     | 1.295083 | 0.025451 | 0.213929 |
| TXLNB    | 1.586456 | 0.025466 | 0.213929 |
| MKL1     | -1.37699 | 0.025485 | 0.213955 |
| AP1B1    | -1.45821 | 0.025607 | 0.214574 |
| FAM174A  | 1.27817  | 0.025651 | 0.214808 |
| KIAA1462 | 1.586046 | 0.02573  | 0.214966 |

|          |          |          |          |
|----------|----------|----------|----------|
| PNMT     | -1.72569 | 0.025732 | 0.214966 |
| ORMDL2   | -2.05082 | 0.025742 | 0.214966 |
| HINT1    | -1.29894 | 0.02579  | 0.214966 |
| CD68     | -2.55131 | 0.0258   | 0.214966 |
| EIF3L    | 1.300989 | 0.025813 | 0.214966 |
| C6orf125 | 1.309677 | 0.025891 | 0.215485 |
| ATP6V1B2 | -1.15918 | 0.025914 | 0.215537 |
| YBEY     | 1.467991 | 0.025991 | 0.215911 |
| PDIA6    | -1.39676 | 0.026085 | 0.216561 |
| FAM193B  | 1.371308 | 0.026129 | 0.216655 |
| LRRC14B  | 1.729572 | 0.026205 | 0.217157 |
| XAF1     | 1.718755 | 0.026261 | 0.217354 |
| PARVA    | -1.66393 | 0.026334 | 0.217669 |
| CADPS    | 1.870189 | 0.026364 | 0.217669 |
| GGCT     | -1.50111 | 0.026516 | 0.218252 |
| PRPF40B  | 1.371728 | 0.026554 | 0.218302 |
| MICALL1  | -1.68262 | 0.026645 | 0.218914 |
| TIE1     | 1.266856 | 0.026718 | 0.219377 |
| FUNDC2   | -1.32404 | 0.026747 | 0.219396 |
| PDCD6IP  | -1.51263 | 0.026801 | 0.219396 |
| KLHL22   | 1.338391 | 0.026867 | 0.219667 |
| PTTG1IP  | -1.40219 | 0.026943 | 0.21983  |
| PHLDB2   | 1.66777  | 0.026988 | 0.21983  |
| ALDH1A1  | 1.951972 | 0.02703  | 0.21983  |

|         |          |          |          |
|---------|----------|----------|----------|
| ANTXR1  | 1.513291 | 0.027034 | 0.21983  |
| SEPT7P2 | 1.571809 | 0.02707  | 0.219992 |
| IFI30   | -3.21261 | 0.027092 | 0.220036 |
| LTBP2   | 2.974202 | 0.027254 | 0.220862 |
| MYH11   | 2.32651  | 0.027276 | 0.220862 |
| ATP1B1  | -1.26978 | 0.02741  | 0.221487 |
| COLQ    | 2.651231 | 0.02743  | 0.221487 |
| SKP1    | 1.167759 | 0.027462 | 0.221487 |
| DIRAS1  | -1.99212 | 0.027483 | 0.221487 |
| NSMCE1  | 1.395568 | 0.027484 | 0.221487 |
| MED12   | 1.341534 | 0.027526 | 0.221664 |
| EXOC7   | 1.224788 | 0.027663 | 0.221664 |
| ASAH1   | 1.278752 | 0.027718 | 0.221664 |
| ACE     | 2.105011 | 0.027722 | 0.221664 |
| C1R     | -1.8785  | 0.027737 | 0.221664 |
| SLCO4A1 | -3.57496 | 0.027852 | 0.222392 |
| HMGXB3  | -1.26583 | 0.027861 | 0.222392 |
| RBPM2   | -1.4313  | 0.027912 | 0.222671 |
| VASP    | -1.8076  | 0.028037 | 0.223536 |
| LRRC39  | 1.566413 | 0.028162 | 0.223942 |
| HK1     | -1.45545 | 0.028188 | 0.223942 |
| CAPZA1  | -1.41345 | 0.028234 | 0.223995 |
| YWHAH   | -1.50463 | 0.028378 | 0.223995 |
| FLT1    | -1.78717 | 0.028402 | 0.223995 |

|          |          |          |          |
|----------|----------|----------|----------|
| ALG3     | -1.78411 | 0.028462 | 0.223995 |
| KLC4     | 1.229575 | 0.028495 | 0.223995 |
| ADAM9    | -1.56593 | 0.028509 | 0.223995 |
| LSG1     | -1.61744 | 0.028554 | 0.223995 |
| NFS1     | 1.293047 | 0.028608 | 0.223995 |
| SLC2A11  | 1.393368 | 0.028621 | 0.223995 |
| ACTB     | -1.65103 | 0.028627 | 0.223995 |
| PLAA     | -1.34539 | 0.028683 | 0.224209 |
| WNT9A    | 11.19941 | 0.028688 | 0.224209 |
| SLC31A2  | -1.54412 | 0.028749 | 0.224213 |
| LACTB    | -1.30857 | 0.028802 | 0.224213 |
| TAF9     | -1.20913 | 0.028805 | 0.224213 |
| HCLS1    | -2.098   | 0.029009 | 0.225447 |
| PRKRA    | -1.12513 | 0.029031 | 0.225447 |
| VMP1     | -1.53949 | 0.029174 | 0.22582  |
| DIDO1    | 1.188056 | 0.029196 | 0.22582  |
| C15orf59 | -2.80266 | 0.029216 | 0.225842 |
| ZNF211   | 1.337878 | 0.029254 | 0.225857 |
| PLA2G4C  | 1.533831 | 0.029301 | 0.225857 |
| MAU2     | 1.328888 | 0.029321 | 0.225875 |
| DDX24    | 1.209201 | 0.029345 | 0.225933 |
| TXNDC11  | -1.17785 | 0.02944  | 0.226246 |
| USP7     | -1.24883 | 0.029447 | 0.226246 |
| PYROXD2  | 1.555384 | 0.0295   | 0.226246 |

|           |          |          |          |
|-----------|----------|----------|----------|
| SH3GLB1   | -1.53318 | 0.029503 | 0.226246 |
| GARS      | -1.45949 | 0.02955  | 0.226325 |
| RRP15     | -1.39188 | 0.029614 | 0.226325 |
| RNF6      | -1.51924 | 0.029619 | 0.226325 |
| CCT6A     | -1.3676  | 0.029631 | 0.226325 |
| PKM2      | -1.32845 | 0.0298   | 0.226619 |
| C14orf180 | 1.599682 | 0.029804 | 0.226619 |
| POLR2C    | 1.159056 | 0.029992 | 0.227235 |
| PCBP2     | 1.157148 | 0.030068 | 0.227235 |
| NAGLU     | -1.53698 | 0.030096 | 0.227235 |
| NSMAF     | -1.17264 | 0.030188 | 0.227235 |
| SLC50A1   | -1.84016 | 0.030215 | 0.227235 |
| PTPRE     | -1.70247 | 0.030368 | 0.227235 |
| ELMO1     | -1.56918 | 0.030413 | 0.227235 |
| UBE2N     | -1.19847 | 0.030441 | 0.227235 |
| IP6K2     | 1.485735 | 0.030478 | 0.227235 |
| NCAM1     | -1.53772 | 0.030498 | 0.227235 |
| EIF3M     | -1.36045 | 0.030509 | 0.227235 |
| NME4      | 1.441814 | 0.030541 | 0.227244 |
| CA14      | -2.56478 | 0.030544 | 0.227244 |
| GP1BB     | 2.667212 | 0.030665 | 0.228014 |
| SNHG9     | 1.647159 | 0.030701 | 0.228154 |
| MRPL45    | 1.242887 | 0.030823 | 0.228768 |
| ABCE1     | -1.61985 | 0.030884 | 0.228768 |



|          |          |          |          |
|----------|----------|----------|----------|
| ABCA8    | 1.736042 | 0.030886 | 0.228768 |
| FAM89B   | -1.37012 | 0.030902 | 0.228768 |
| BAG2     | -1.40849 | 0.030929 | 0.22884  |
| SMTNL2   | -4.08587 | 0.030977 | 0.228943 |
| AP1S2    | -1.38351 | 0.031014 | 0.229093 |
| PCBD1    | 1.253929 | 0.031095 | 0.229563 |
| PSMD2    | -1.20611 | 0.031259 | 0.230613 |
| ADAL     | 1.442522 | 0.031325 | 0.230613 |
| ZBTB1    | 1.26691  | 0.031378 | 0.230613 |
| MAP1LC3B | -1.52781 | 0.031385 | 0.230613 |
| RALGPS1  | 1.28656  | 0.031408 | 0.230613 |
| MRPL15   | -1.13269 | 0.03148  | 0.231013 |
| CLINT1   | -1.27034 | 0.031532 | 0.231015 |
| SEC23IP  | -1.42533 | 0.031627 | 0.231446 |
| RPL21    | -1.6047  | 0.031642 | 0.231446 |
| TIMP2    | 1.400658 | 0.031704 | 0.231771 |
| LMCD1    | -2.80315 | 0.031731 | 0.231847 |
| BCL9L    | -1.91672 | 0.03183  | 0.232442 |
| PDCD5    | -1.33284 | 0.03188  | 0.23268  |
| HYOU1    | -1.93437 | 0.03194  | 0.232864 |
| RAB3GAP1 | 1.138013 | 0.032071 | 0.232937 |
| PSMB3    | -1.23824 | 0.032095 | 0.232937 |
| DHX15    | -1.39308 | 0.032103 | 0.232937 |
| GLUL     | -1.6484  | 0.032112 | 0.232937 |

|          |          |          |          |
|----------|----------|----------|----------|
| VPRBP    | -1.33299 | 0.032139 | 0.232937 |
| AP3M2    | 1.601162 | 0.03214  | 0.232937 |
| KCTD10   | -1.43168 | 0.032208 | 0.233306 |
| C10orf58 | -1.51983 | 0.032302 | 0.233731 |
| MTCH1    | -1.44312 | 0.032328 | 0.233766 |
| PLXDC1   | 1.597034 | 0.032372 | 0.233766 |
| CLIP1    | -1.50433 | 0.032376 | 0.233766 |
| BNIP3L   | -1.19584 | 0.032484 | 0.233999 |
| TBRG1    | -1.32175 | 0.032488 | 0.233999 |
| AKIRIN1  | -1.39192 | 0.032495 | 0.233999 |
| DYNC2LI1 | 1.436198 | 0.032578 | 0.234219 |
| TMEM42   | 1.521974 | 0.032607 | 0.234306 |
| BCAS3    | 1.423733 | 0.032679 | 0.234571 |
| TMEM47   | 1.295019 | 0.032777 | 0.235148 |
| PPP1R1A  | -1.84533 | 0.032838 | 0.235458 |
| UBAC2    | 1.296886 | 0.032902 | 0.235542 |
| SLC25A30 | 1.648336 | 0.032953 | 0.235785 |
| ACE2     | 2.17204  | 0.033119 | 0.236567 |
| C6orf89  | -1.32414 | 0.033141 | 0.236567 |
| PLEKHA6  | 1.504181 | 0.033178 | 0.236567 |
| SGCA     | 1.373607 | 0.033178 | 0.236567 |
| CLPTM1L  | -1.30386 | 0.033232 | 0.236567 |
| RPS6KA4  | -1.42926 | 0.033239 | 0.236567 |
| BDH2     | 1.394632 | 0.033332 | 0.236567 |

|          |          |          |          |
|----------|----------|----------|----------|
| EMP3     | -1.87531 | 0.033335 | 0.236567 |
| CDCA7L   | 1.503478 | 0.033347 | 0.236567 |
| PSME4    | -1.27308 | 0.033355 | 0.236567 |
| STK3     | -1.56355 | 0.03336  | 0.236567 |
| XPO4     | 1.650154 | 0.033402 | 0.236567 |
| LGI4     | 1.754198 | 0.033443 | 0.236567 |
| PSMC2    | -1.19834 | 0.033453 | 0.236567 |
| GMPR     | -1.43227 | 0.033458 | 0.236567 |
| CXCL12   | 1.603557 | 0.033484 | 0.236567 |
| DOCK6    | 1.332299 | 0.033588 | 0.237035 |
| GLRX2    | -1.57025 | 0.033603 | 0.237035 |
| IGHMBP2  | -1.21722 | 0.033828 | 0.238495 |
| PELO     | -1.32353 | 0.033904 | 0.238904 |
| A4GALT   | -1.58911 | 0.033993 | 0.239408 |
| INTS12   | -1.24297 | 0.034071 | 0.239546 |
| RBM20    | 1.438566 | 0.034145 | 0.239546 |
| GPT      | -1.60619 | 0.034151 | 0.239546 |
| AMZ2     | 1.319708 | 0.03419  | 0.239546 |
| SOCS2    | 1.813884 | 0.034239 | 0.239759 |
| MTMR9LP  | 1.662174 | 0.034288 | 0.239984 |
| C1orf144 | -1.38575 | 0.034415 | 0.240619 |
| TMED2    | -1.28842 | 0.034513 | 0.241182 |
| ERO1L    | -2.25789 | 0.034624 | 0.241717 |
| DPP3     | -2.07129 | 0.034644 | 0.241717 |

|          |          |          |          |
|----------|----------|----------|----------|
| FZD4     | 1.382935 | 0.03473  | 0.241857 |
| SRPK3    | 1.480042 | 0.034738 | 0.241857 |
| PCNT     | -1.82822 | 0.034754 | 0.241857 |
| GALK1    | -1.58251 | 0.034842 | 0.242348 |
| ZMPSTE24 | -1.45886 | 0.03489  | 0.24251  |
| KIAA0195 | 1.255337 | 0.034902 | 0.24251  |
| C19orf66 | 1.268988 | 0.034973 | 0.242783 |
| UQCRC2   | 1.241832 | 0.03501  | 0.242783 |
| MTA2     | -1.29947 | 0.0351   | 0.242783 |
| SUN1     | 1.305712 | 0.035121 | 0.242783 |
| CXorf26  | -1.46788 | 0.035124 | 0.242783 |
| MEMO1    | -1.48766 | 0.035139 | 0.242783 |
| NDFIP2   | -1.49893 | 0.035175 | 0.242784 |
| MAPK12   | 1.514719 | 0.035267 | 0.24316  |
| ITGB2    | -2.49543 | 0.035284 | 0.24316  |
| CCNB1IP1 | 1.310954 | 0.035468 | 0.243576 |
| TUBA8    | 1.508068 | 0.035524 | 0.243576 |
| EDIL3    | 2.233263 | 0.035577 | 0.243576 |
| MLEC     | -1.33013 | 0.035632 | 0.243576 |
| TBC1D7   | 1.426917 | 0.035801 | 0.243576 |
| AGFG2    | -1.42984 | 0.035803 | 0.243576 |
| NUDT3    | 1.28274  | 0.035897 | 0.243576 |
| EIF5B    | -1.47742 | 0.035912 | 0.243576 |
| F8       | -1.30721 | 0.035917 | 0.243576 |

|          |          |          |          |
|----------|----------|----------|----------|
| FOXJ3    | 1.158683 | 0.035919 | 0.243576 |
| HES4     | 1.45909  | 0.035968 | 0.243576 |
| FBXO25   | 1.222277 | 0.03599  | 0.243576 |
| NASP     | -1.32837 | 0.036009 | 0.243576 |
| PRPF31   | 1.148294 | 0.036018 | 0.243576 |
| PEA15    | -1.53606 | 0.036028 | 0.243576 |
| PLAGL1   | 1.530738 | 0.03605  | 0.243576 |
| MAFK     | 1.97565  | 0.036144 | 0.243658 |
| TRIM47   | -1.96006 | 0.036221 | 0.243658 |
| OGG1     | 1.35273  | 0.036243 | 0.243658 |
| JAGN1    | -1.39492 | 0.036389 | 0.244521 |
| GALT     | 1.330402 | 0.036481 | 0.245016 |
| RHBDF1   | 1.351263 | 0.036534 | 0.245246 |
| C1QC     | -1.98089 | 0.036571 | 0.245252 |
| COX17    | -1.28862 | 0.036614 | 0.245415 |
| NOP10    | -1.27561 | 0.036676 | 0.245711 |
| C11orf48 | -1.28679 | 0.036825 | 0.245839 |
| POLR1A   | -1.64246 | 0.036913 | 0.245839 |
| OSMR     | -2.97619 | 0.036969 | 0.245839 |
| PRDX1    | -1.31697 | 0.036996 | 0.245839 |
| ZBTB4    | 1.340819 | 0.037016 | 0.245839 |
| CRELD1   | 1.273742 | 0.037045 | 0.245839 |
| FGFRL1   | -1.50345 | 0.037062 | 0.245839 |
| XBP1     | -1.75289 | 0.037089 | 0.245839 |

|         |          |          |          |
|---------|----------|----------|----------|
| TEAD4   | -4.59085 | 0.037124 | 0.245839 |
| P2RX5   | -2.43081 | 0.037152 | 0.245839 |
| EIF2S1  | -1.41776 | 0.037222 | 0.246186 |
| CAP1    | -1.60636 | 0.03743  | 0.246823 |
| NOP16   | -1.93443 | 0.037436 | 0.246823 |
| C4orf42 | 1.312798 | 0.037461 | 0.246823 |
| SMC1A   | -1.51363 | 0.037518 | 0.246823 |
| GPN1    | -1.12051 | 0.037545 | 0.246823 |
| TMED5   | -1.52817 | 0.037557 | 0.246823 |
| POLR2D  | -1.37712 | 0.037603 | 0.247004 |
| EI24    | -1.32851 | 0.03777  | 0.247859 |
| TMEM214 | -1.27084 | 0.03787  | 0.248278 |
| CTSO    | 1.409117 | 0.037957 | 0.248347 |
| SUPT7L  | 1.116082 | 0.038056 | 0.248347 |
| SMAD7   | 1.672844 | 0.038098 | 0.248347 |
| MYADM   | -1.70565 | 0.038199 | 0.248347 |
| MGST1   | -3.98235 | 0.038205 | 0.248347 |
| SNRNP27 | -1.12017 | 0.038219 | 0.248347 |
| SNORA77 | -3.47354 | 0.038238 | 0.248347 |
| WDR1    | -1.68549 | 0.03825  | 0.248347 |
| TNNC1   | 1.312742 | 0.038576 | 0.249688 |
| SRL     | -1.34529 | 0.038594 | 0.249688 |
| NOL6    | -1.51222 | 0.038647 | 0.249688 |
| MLX     | -1.34131 | 0.038746 | 0.249688 |

|          |          |          |          |
|----------|----------|----------|----------|
| LTBP3    | 1.729146 | 0.038816 | 0.249688 |
| ARPC4    | -1.3873  | 0.038835 | 0.249688 |
| CALU     | -1.83217 | 0.038842 | 0.249688 |
| C12orf39 | 1.531052 | 0.038859 | 0.249688 |
| UGP2     | -1.37406 | 0.038883 | 0.249688 |
| C4orf52  | 1.404571 | 0.038903 | 0.249699 |
| RAMP2    | 1.660982 | 0.039003 | 0.250219 |
| TAF13    | -1.28376 | 0.039052 | 0.250414 |
| RPGR     | -1.63432 | 0.039093 | 0.250442 |
| IFT20    | 1.405256 | 0.039284 | 0.251544 |
| XRN2     | -1.28839 | 0.039348 | 0.251832 |
| NPIP     | 1.254752 | 0.039402 | 0.25206  |
| IFNAR1   | -1.38567 | 0.039455 | 0.252249 |
| RAE1     | -1.21707 | 0.039504 | 0.252249 |
| QTRT1    | 1.426322 | 0.039506 | 0.252249 |
| ARAP3    | 1.266354 | 0.039565 | 0.252504 |
| ARF4     | -1.27974 | 0.039584 | 0.252504 |
| C1QB     | -2.14822 | 0.039782 | 0.253647 |
| FABP3    | 1.316121 | 0.039804 | 0.253671 |
| SEC23A   | -1.53422 | 0.039825 | 0.25368  |
| HLTF     | 1.588859 | 0.039895 | 0.253889 |
| OSTM1    | -1.52908 | 0.040002 | 0.254246 |
| ABTB1    | 1.565182 | 0.040032 | 0.254246 |
| ATP6V1F  | -1.24278 | 0.040081 | 0.254246 |

|          |          |          |          |
|----------|----------|----------|----------|
| HHATL    | 1.529851 | 0.04012  | 0.254246 |
| RASL11B  | 1.86117  | 0.040257 | 0.254246 |
| SARS     | -1.2785  | 0.040314 | 0.254246 |
| FAM69B   | 1.527958 | 0.040322 | 0.254246 |
| TTL      | -1.26636 | 0.040329 | 0.254246 |
| TPM4     | -1.71999 | 0.040334 | 0.254246 |
| OBSL1    | 1.548328 | 0.040376 | 0.254246 |
| HRH2     | -1.44736 | 0.040404 | 0.254246 |
| GLT8D2   | 1.547394 | 0.040551 | 0.254997 |
| KRT8     | -2.26063 | 0.040562 | 0.254997 |
| SYNCRIP  | -1.35158 | 0.040986 | 0.256677 |
| QRICH1   | -1.24812 | 0.041018 | 0.256677 |
| ELOVL5   | -1.82524 | 0.041061 | 0.256677 |
| BTN3A1   | 2.178881 | 0.041086 | 0.256677 |
| TMEM39A  | -1.53772 | 0.041096 | 0.256677 |
| SLC7A6OS | 1.221983 | 0.041176 | 0.257062 |
| PHF23    | -1.3259  | 0.04121  | 0.257152 |
| NDUFA7   | 1.26817  | 0.04129  | 0.257301 |
| MAVS     | -1.66707 | 0.041347 | 0.257301 |
| MRPL21   | 1.30703  | 0.041358 | 0.257301 |
| PRAF2    | -1.34119 | 0.041396 | 0.257301 |
| C19orf12 | -1.2902  | 0.041407 | 0.257301 |
| ACTR3    | -1.53306 | 0.041454 | 0.257301 |
| YPEL3    | 1.666806 | 0.041463 | 0.257301 |



|          |          |          |          |
|----------|----------|----------|----------|
| RGL1     | 1.294611 | 0.041675 | 0.258297 |
| RNASEH1  | -1.32745 | 0.041733 | 0.258297 |
| SLC1A5   | -2.93987 | 0.041776 | 0.258297 |
| SPTAN1   | 1.266232 | 0.041808 | 0.258297 |
| MARS     | -1.30375 | 0.041809 | 0.258297 |
| DALRD3   | 1.596898 | 0.041835 | 0.258297 |
| IMMP1L   | 1.292872 | 0.041946 | 0.258866 |
| NAP1L1   | 1.121029 | 0.042053 | 0.259222 |
| AEBP1    | 2.163932 | 0.042062 | 0.259222 |
| SLC35A4  | -1.27844 | 0.042169 | 0.259766 |
| RAB24    | 1.647295 | 0.042237 | 0.259946 |
| VCL      | -1.78123 | 0.042452 | 0.260667 |
| GAB3     | 1.481943 | 0.042461 | 0.260667 |
| NRSN2    | -1.44217 | 0.042539 | 0.260667 |
| MAP2K5   | 1.295313 | 0.042596 | 0.260667 |
| ARPC1A   | 1.299493 | 0.042608 | 0.260667 |
| PDPN     | -1.63712 | 0.042685 | 0.260667 |
| ARHGEF9  | 1.199577 | 0.042701 | 0.260667 |
| HTRA3    | 1.996047 | 0.042703 | 0.260667 |
| ZDHHC16  | -1.4777  | 0.042807 | 0.260716 |
| NET1     | 1.483291 | 0.042914 | 0.261128 |
| HMGB2    | 1.642809 | 0.042997 | 0.261278 |
| EPN3     | -1.64621 | 0.043048 | 0.261338 |
| C20orf26 | 2.287789 | 0.043065 | 0.261338 |

|          |          |          |          |
|----------|----------|----------|----------|
| SIX5     | 1.480015 | 0.043084 | 0.261338 |
| CAND2    | 1.35531  | 0.043264 | 0.261759 |
| ABHD14B  | 1.629768 | 0.043313 | 0.261759 |
| PDE2A    | -1.47008 | 0.043342 | 0.261759 |
| ARHGAP31 | -1.81129 | 0.043348 | 0.261759 |
| C11orf71 | 1.397561 | 0.043396 | 0.261931 |
| PLOD1    | -1.53409 | 0.04351  | 0.262503 |
| GATAD1   | 1.294861 | 0.043551 | 0.262634 |
| FASTKD2  | -1.22189 | 0.043665 | 0.262968 |
| SNRPD1   | -1.3994  | 0.04369  | 0.263001 |
| TSEN34   | 1.338182 | 0.043907 | 0.263998 |
| BCL6     | -2.72546 | 0.043985 | 0.263998 |
| CHCHD8   | -1.2692  | 0.04401  | 0.263998 |
| C5orf43  | -1.21402 | 0.044031 | 0.263998 |
| KIAA0930 | -1.40714 | 0.044032 | 0.263998 |
| MZT2A    | -1.41051 | 0.044179 | 0.26473  |
| TMEM165  | -1.79916 | 0.044232 | 0.26473  |
| MRPS26   | 1.336363 | 0.04429  | 0.26473  |
| COMMD7   | -1.52506 | 0.044346 | 0.26473  |
| ACO2     | 1.230114 | 0.044354 | 0.26473  |
| IL6ST    | -1.99529 | 0.044394 | 0.26473  |
| ANXA7    | 1.143008 | 0.044403 | 0.26473  |
| PSMD12   | -1.47282 | 0.044477 | 0.26473  |
| ITGA5    | -2.38048 | 0.044543 | 0.26473  |

|           |          |          |          |
|-----------|----------|----------|----------|
| GSTA4     | 1.373495 | 0.044598 | 0.26473  |
| FKBP1A    | -1.47498 | 0.044621 | 0.26473  |
| SDCCAG3   | -1.31091 | 0.044633 | 0.26473  |
| POLR1D    | -1.16356 | 0.044709 | 0.26473  |
| PRELID1   | -1.4626  | 0.044714 | 0.26473  |
| CORO1C    | -1.4409  | 0.044726 | 0.26473  |
| USP14     | -1.39994 | 0.04474  | 0.26473  |
| POLR1B    | -1.67638 | 0.044746 | 0.26473  |
| RPL22L1   | -2.40206 | 0.044792 | 0.26473  |
| C20orf4   | -1.19706 | 0.044814 | 0.26473  |
| GOLT1B    | -1.54754 | 0.044824 | 0.26473  |
| RABGGTA   | -1.31867 | 0.044843 | 0.26473  |
| TOMM20    | 1.240296 | 0.044908 | 0.264951 |
| TACC2     | 1.26371  | 0.044978 | 0.264951 |
| PPP1CC    | -1.20555 | 0.045045 | 0.265228 |
| SLC29A2   | -1.63926 | 0.045139 | 0.265665 |
| COL4A1    | -1.77404 | 0.045421 | 0.266508 |
| GRPEL1    | -1.29074 | 0.045459 | 0.266508 |
| EGFL7     | 1.32213  | 0.045471 | 0.266508 |
| FAM20C    | -1.61474 | 0.045475 | 0.266508 |
| ZBTB7B    | -1.86698 | 0.045551 | 0.266508 |
| GOSR2     | -1.2939  | 0.045574 | 0.266508 |
| KAT5      | 1.161143 | 0.045578 | 0.266508 |
| C10orf125 | -1.85316 | 0.045587 | 0.266508 |

|          |          |          |          |
|----------|----------|----------|----------|
| FAM110B  | 1.236796 | 0.045602 | 0.266508 |
| EXTL3    | -1.51304 | 0.045684 | 0.266508 |
| PPP1R9B  | -1.36878 | 0.04571  | 0.266508 |
| DHCR24   | -3.38048 | 0.045726 | 0.266508 |
| TMEM138  | -1.16188 | 0.045742 | 0.266508 |
| NQO1     | -1.85033 | 0.045794 | 0.266508 |
| TPRG1L   | 1.286849 | 0.045806 | 0.266508 |
| IARS     | -1.44356 | 0.045817 | 0.266508 |
| GFM2     | 1.213037 | 0.046051 | 0.267451 |
| MYH9     | -1.5317  | 0.046058 | 0.267451 |
| PDGFRB   | -1.52955 | 0.046091 | 0.267528 |
| SH3BGRL3 | -2.05821 | 0.046274 | 0.268357 |
| ALOX5    | -2.44208 | 0.046286 | 0.268357 |
| GLRX3    | -1.51823 | 0.046314 | 0.268357 |
| RRAGB    | 1.29442  | 0.046385 | 0.268538 |
| SEPN1    | -1.55581 | 0.046495 | 0.268568 |
| PPFIBP1  | -1.56495 | 0.046542 | 0.268568 |
| COPZ2    | 1.503689 | 0.046576 | 0.268568 |
| AKAP9    | 1.284783 | 0.046578 | 0.268568 |
| SRP72    | -1.31024 | 0.046589 | 0.268568 |
| AGRN     | 1.442762 | 0.046702 | 0.269101 |
| SNN      | -1.52188 | 0.046778 | 0.269424 |
| KCTD9    | -1.25469 | 0.046805 | 0.269465 |
| IPO5     | -1.23413 | 0.046914 | 0.269975 |

|         |          |          |          |
|---------|----------|----------|----------|
| PRR13   | -1.2568  | 0.047013 | 0.270189 |
| DECR2   | 1.341077 | 0.047019 | 0.270189 |
| MED30   | 1.399336 | 0.047031 | 0.270189 |
| ANAPC2  | 1.269599 | 0.0471   | 0.270389 |
| PI16    | 5.60539  | 0.047137 | 0.270389 |
| WDR62   | 1.511446 | 0.047166 | 0.270389 |
| LHPP    | 1.549285 | 0.047248 | 0.270588 |
| MIOS    | -1.25482 | 0.047298 | 0.270588 |
| ITGA3   | -2.09276 | 0.047357 | 0.270588 |
| PABPN1  | 1.216491 | 0.047422 | 0.270588 |
| RAB5C   | -1.37544 | 0.047489 | 0.270588 |
| YARS    | -2.19791 | 0.04754  | 0.270588 |
| CREB3   | -1.36739 | 0.047559 | 0.270588 |
| PICALM  | -1.33892 | 0.047684 | 0.270588 |
| USP40   | 1.347267 | 0.047754 | 0.270588 |
| GTF2H5  | 1.346666 | 0.047816 | 0.270588 |
| DMKN    | 2.301388 | 0.047821 | 0.270588 |
| SSH3    | 1.588105 | 0.047843 | 0.270588 |
| SLC5A6  | -1.64807 | 0.047978 | 0.270588 |
| MDK     | 2.298867 | 0.048117 | 0.270588 |
| LRRC47  | 1.150438 | 0.048133 | 0.270588 |
| LAPTM4A | -1.23872 | 0.048211 | 0.270588 |
| MPP3    | -1.97862 | 0.048229 | 0.270588 |
| UNC45A  | 1.279525 | 0.04823  | 0.270588 |

|          |          |          |          |
|----------|----------|----------|----------|
| DNTTIP1  | 1.328692 | 0.048257 | 0.270588 |
| C10orf54 | -1.87427 | 0.048302 | 0.270588 |
| SOX13    | 1.273136 | 0.048393 | 0.270588 |
| WSB1     | 1.434059 | 0.048393 | 0.270588 |
| EIF3B    | -1.30845 | 0.048424 | 0.270588 |
| ASNS     | -2.63926 | 0.04847  | 0.270588 |
| NSDHL    | -1.78488 | 0.048521 | 0.270588 |
| APPL1    | 1.250375 | 0.048582 | 0.270588 |
| ATP1A1   | -1.88686 | 0.048652 | 0.270588 |
| EIF4A1   | -2.00008 | 0.048659 | 0.270588 |
| FBXO21   | 1.398023 | 0.048827 | 0.270588 |
| RAP1GAP2 | -1.25894 | 0.04883  | 0.270588 |
| CCT7     | -1.19335 | 0.048916 | 0.270588 |
| CACYBP   | -1.49182 | 0.048939 | 0.270588 |
| GALNT2   | -1.49562 | 0.048959 | 0.270588 |
| FAM173A  | 1.617505 | 0.049092 | 0.270588 |
| ST3GAL3  | 1.231324 | 0.049095 | 0.270588 |
| HTATIP2  | -1.52926 | 0.049126 | 0.270588 |
| ANKRD54  | -1.29711 | 0.049146 | 0.270588 |
| ST7L     | 1.219228 | 0.049172 | 0.270588 |
| ABCA2    | 1.30643  | 0.049203 | 0.270588 |
| SLC1A4   | -1.65069 | 0.049227 | 0.270588 |
| LMNA     | -1.84708 | 0.049231 | 0.270588 |
| H1FO     | -2.07808 | 0.049389 | 0.271042 |

|                                                                            |          |          |          |
|----------------------------------------------------------------------------|----------|----------|----------|
| NXN                                                                        | -1.31917 | 0.049465 | 0.271042 |
| NGFRAP1                                                                    | 1.338204 | 0.049545 | 0.271042 |
| GLYR1                                                                      | -1.25322 | 0.049554 | 0.271042 |
| SHOC2                                                                      | -1.24354 | 0.049562 | 0.271042 |
| DNAJB2                                                                     | 1.274112 | 0.049621 | 0.271042 |
| PRKAG2                                                                     | -1.2285  | 0.049627 | 0.271042 |
| GPR172A                                                                    | -1.51213 | 0.049688 | 0.271042 |
| NACC2                                                                      | -1.6375  | 0.049692 | 0.271042 |
| CCT2                                                                       | -1.80528 | 0.049707 | 0.271042 |
| ATP5L                                                                      | 1.162726 | 0.049721 | 0.271042 |
| DCTN5                                                                      | -1.22734 | 0.049776 | 0.271042 |
| ING3                                                                       | -1.32295 | 0.049859 | 0.271276 |
| ABHD5                                                                      | -1.88559 | 0.050047 | 0.272189 |
| MMP19                                                                      | -3.53983 | 0.05012  | 0.272471 |
| NDUFA8                                                                     | 1.233779 | 0.050254 | 0.272979 |
| LTBR                                                                       | -1.27634 | 0.050254 | 0.272979 |
| PAK2                                                                       | -1.45952 | 0.050286 | 0.273017 |
| DDX17                                                                      | 1.421855 | 0.050321 | 0.273017 |
| C3orf43                                                                    | 1.600454 | 0.050344 | 0.273032 |
| Table S3: List of genes dysregulated in pediatric DCM. P-value $\leq$ 0.05 |          |          |          |

|                   |      |        |      |      |      |       |        |       |      |       |      |       |
|-------------------|------|--------|------|------|------|-------|--------|-------|------|-------|------|-------|
|                   | ANF  | FGF18  | JAK2 | TBX5 | CTF1 | WNT9  | CXCL12 | HMGB2 | MDK  | DDX17 | CUX1 | CCND1 |
| Age at Transplant | 0.81 | 0.0014 | 0.89 | 0.6  | 0.05 | 0.047 | 0.008  | 0.44  | 0.07 | 0.13  | 0.09 | 0.46  |

Table S4: Regression analysis of gene expression based on patient age at the time of transplant and at the time of disease presentation. Pvalues are shown.

| MOTIF NAME | PVALUE  | QVALUE |
|------------|---------|--------|
| Klf5       | <0.0001 | 0      |
| Klf4       | <0.0001 | 0      |
| E2A        | <0.0001 | 0      |
| Stat3      | <0.0001 | 0      |
| Oct4       | <0.0001 | 0      |
| Nanog      | <0.0001 | 0      |
| Stat4      | <0.0001 | 0      |
| Esrrb      | <0.0001 | 0      |
| Oct4       | <0.0001 | 0      |
| Tbx5       | <0.0001 | 0.0001 |
| Smad3      | <0.0001 | 0.0001 |
| Sox2       | 0.0001  | 0.0009 |

Table S5: enriched motifs in the promoters of significantly changed genes in IDCM patients. Duplicate transcription factors represent differing motifs derived from different studies.



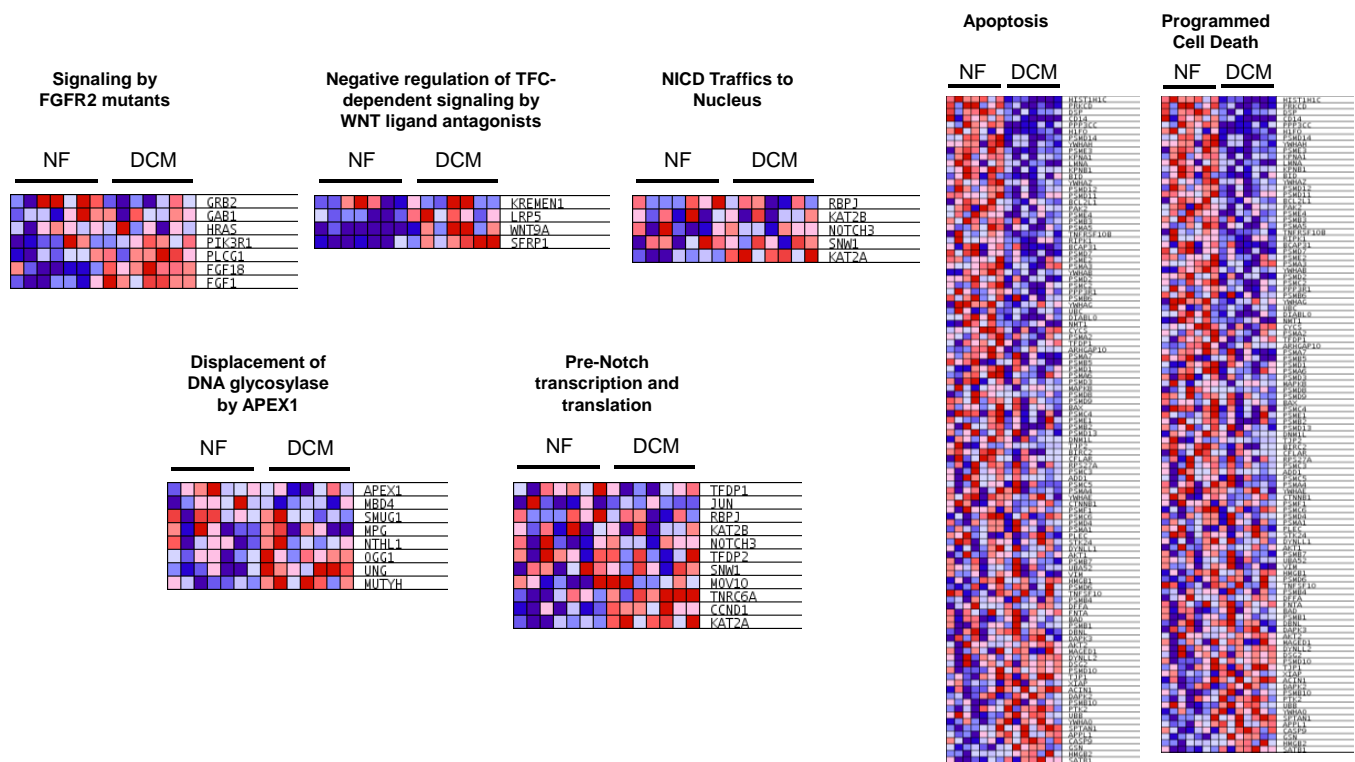

Supplemental Figure 1: Heatmaps of the genes from each pathway found enriched in the GSEA analysis. Red is associated with higher relative expression, while blue is associated with lower relative expression.

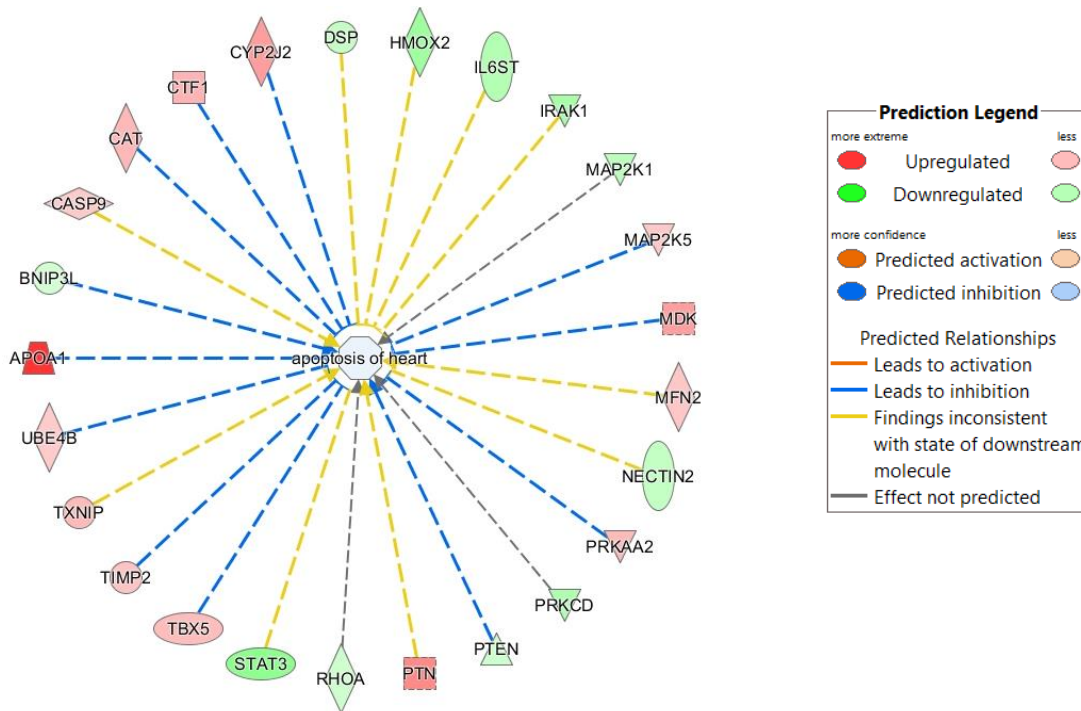

Supplemental Figure 2: Confirmatory GSEA analysis using Ingenuity Pathway Analysis (IPA). IPA of dysregulated genes in pediatric DCM showing predicted down-regulation of apoptosis. Colors are indicative of activation or repression and are described in the Figure. P values and z-scores for predicted response are stated in the text.

**Embryonic day 12.5  
compared to adult**

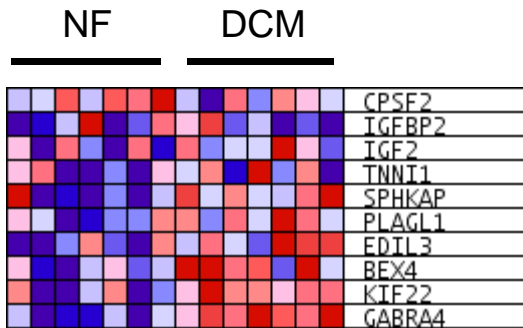

**Embryonic day 14.5  
compared to adult**

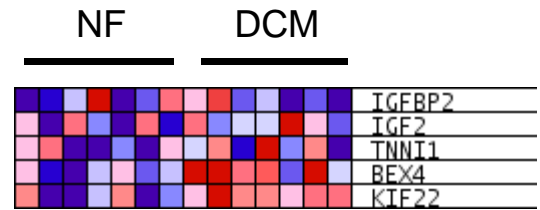

Supplemental Figure 3: Heatmaps of the genes specifically up- or down-regulated in mouse embryonic days 12.5 and 14.5 when compared to adults, and found to be enriched in pediatric patients using GSEA. Red is associated with higher relative expression, while blue is associated with lower relative expression.

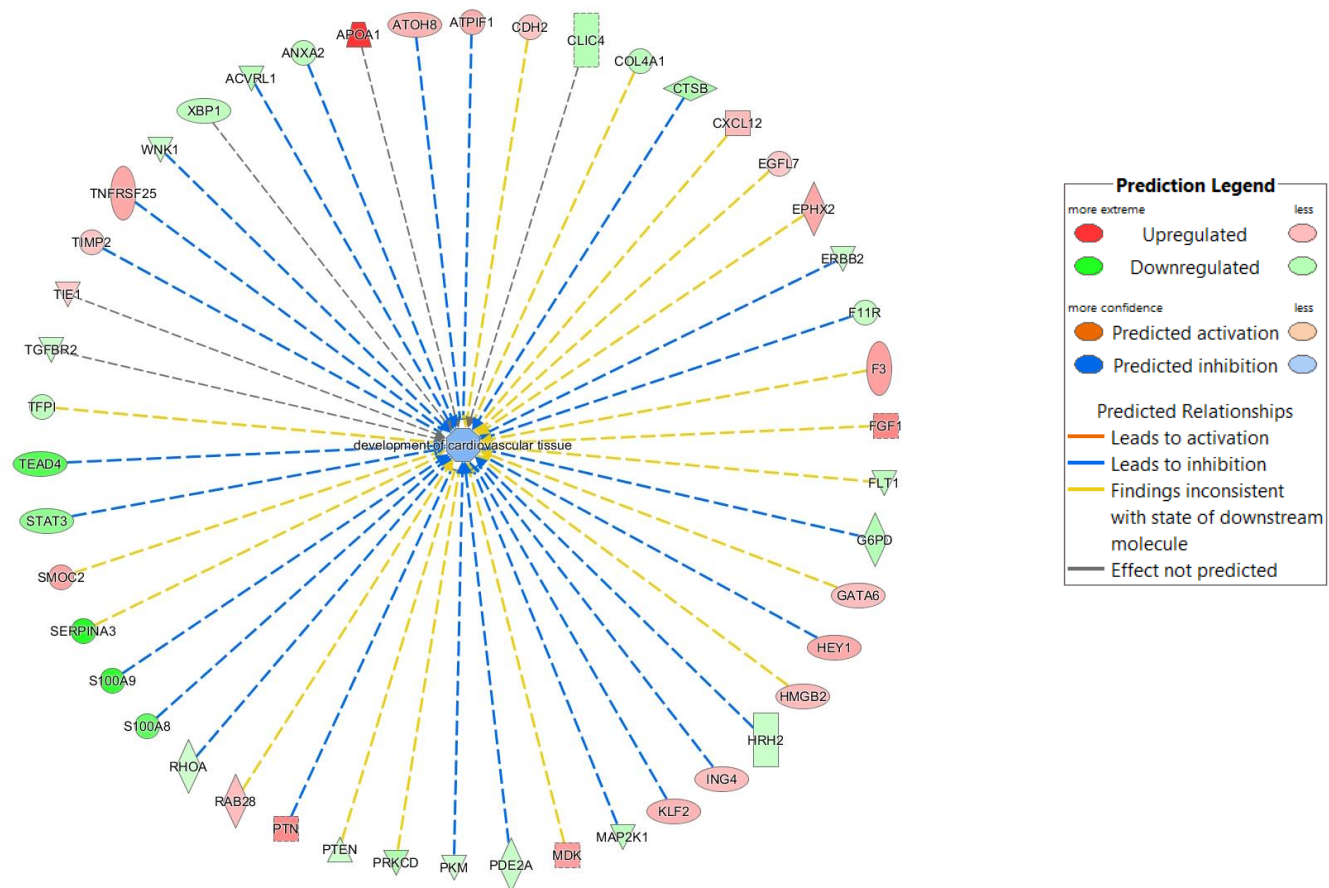

Supplemental Figure 4: IPA of dysregulated genes in pediatric DCM patients suggests down-regulation of cardiovascular tissue development. Colors are indicative of activation or repression and are described in the Figure. P values and z-scores for predicted response are stated in the text.

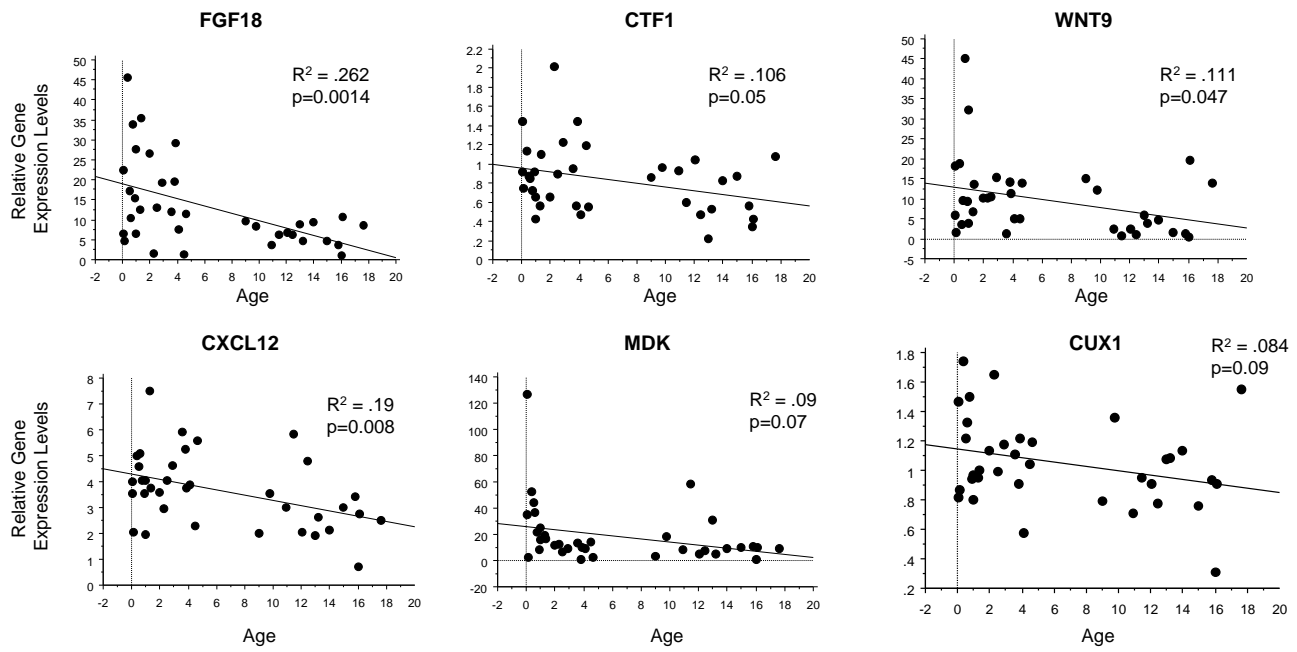

Supplemental Figure 5: Regression analysis of age and gene expression as determined by RT-PCR. Only significant results ( $p < 0.1$ ) are shown in the Figure.

**Up-regulated in Adult DCM  
compared to NF**

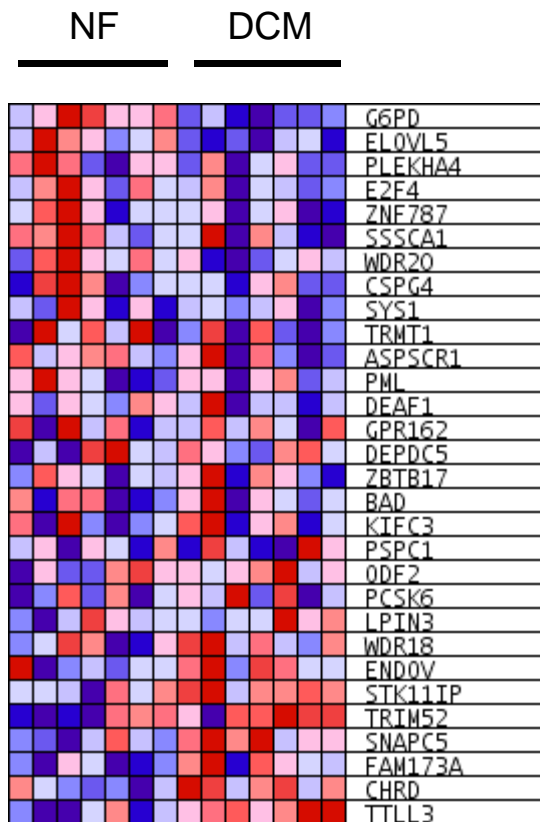

**Down-regulated in Adult DCM  
compared to NF**

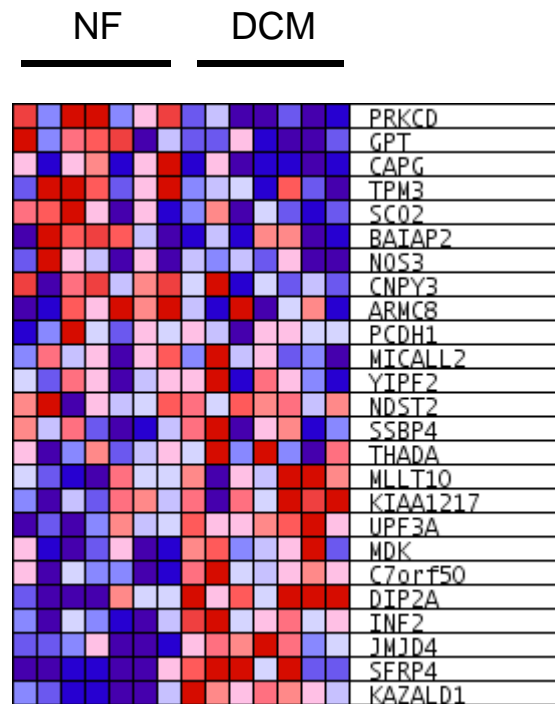

Supplemental Figure 6: Heatmaps of the genes up- or down-regulated in adult DCM patients that were also dysregulated in pediatric patients. As shown in the heatmap, expression of pediatric DCM genes is both up- and down-regulated in up- or down-regulated-specific adult datasets. No significant enrichment was found using GSEA analysis. Red is associated with higher relative expression in pediatric DCM patients, while blue is associated with lower relative expression in pediatric DCM patients.

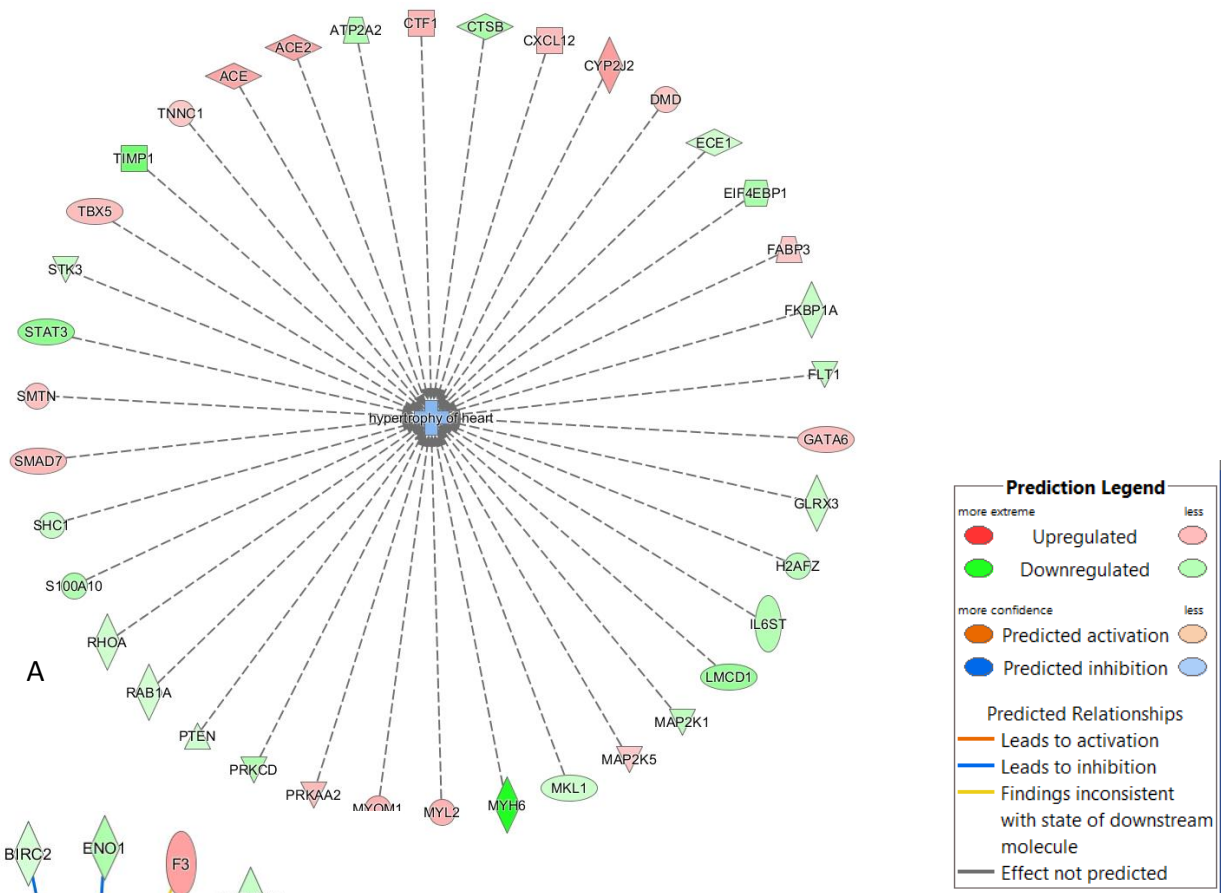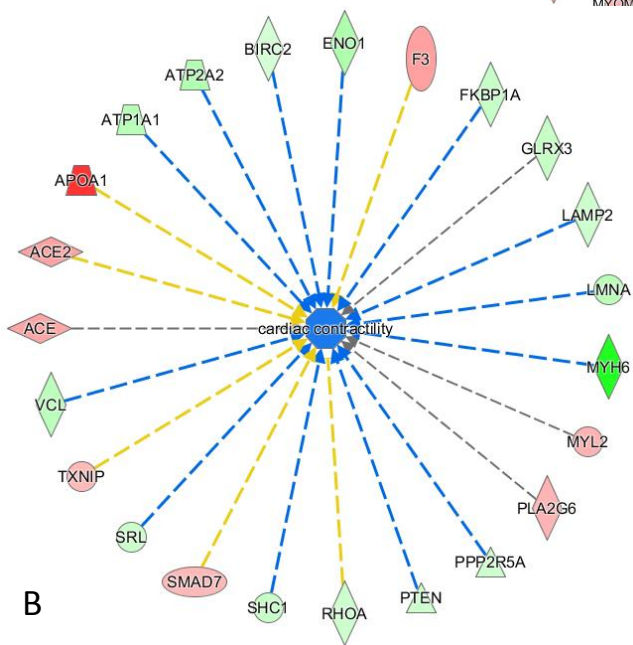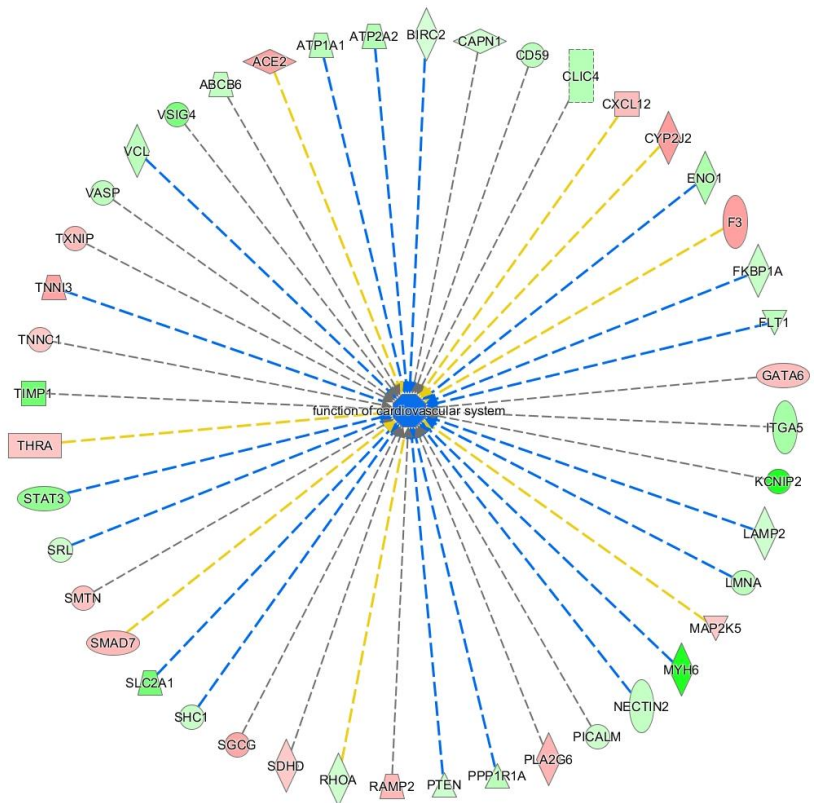

Supplemental Figure 7: IPA of dysregulated genes in pediatric DCM patients suggests a decrease in hypertrophy (A), contractility (B) and cardiac function (C). Colors are indicative of activation or repression and are described in the Figure. P values and z-scores for predicted response are stated in the text.
